# Supplementary material
Source: publisher figshare collection journal article supplement (https://brill.figshare.com/ndownloader/files/28720137)
Supplement: Supplementary file 1 [file 28720137]

## Sheet: raw_network_CHER
Table S1. CHER: Authors (coded) for network analysis.
CA_178	CA_286	CA_555	CA_023	CA_439
CA_532	CA_343	CA_502
CA_147	CA_384	CA_074	CA_510	CA_078
CA_073	CA_368	CA_571	CA_214
CA_020	CA_032
CA_401	CA_082
CA_021	CA_576	CA_225
CA_151	CA_237	CA_350	CA_195	CA_575
CA_330	CA_417
CA_334	CA_473
CA_181	CA_430	CA_220	CA_396	CA_346
CA_127	CA_502	CA_452
CA_453	CA_484	CA_204	CA_036
CA_502	CA_343	CA_042	CA_108	CA_171
CA_021	CA_167	CA_131
CA_502	CA_343	CA_188	CA_108
CA_386	CA_247
CA_485	CA_197
CA_436	CA_335	CA_545
CA_177	CA_189
CA_169	CA_543	CA_131
CA_566	CA_367	CA_153	CA_402
CA_453	CA_434	CA_419
CA_189	CA_106
CA_115	CA_054	CA_256	CA_048
CA_576	CA_021
CA_502	CA_343	CA_536
CA_257	CA_189
CA_366	CA_283	CA_083
CA_292	CA_169
CA_131	CA_167	CA_469
CA_427	CA_506
CA_496	CA_113
CA_408	CA_326	CA_485	CA_197	CA_454	CA_013
CA_408	CA_485
CA_417	CA_330	CA_319
CA_397	CA_488	CA_470	CA_046	CA_215	CA_011
CA_485	CA_408
CA_412	CA_341
CA_118	CA_516	CA_185
CA_151	CA_350
CA_516	CA_180	CA_118
CA_197	CA_194	CA_454
CA_122	CA_495	CA_088	CA_155
CA_254	CA_437	CA_355
CA_569	CA_124	CA_475
CA_178	CA_159	CA_023	CA_286
CA_058	CA_516
CA_537	CA_008
CA_575	CA_237	CA_195
CA_502	CA_343
CA_151	CA_350
CA_417	CA_330	CA_131
CA_074	CA_519	CA_132	CA_539
CA_457	CA_135	CA_207
CA_136	CA_539	CA_286
CA_107	CA_355	CA_054
CA_264	CA_456
CA_152	CA_519	CA_057	CA_406
CA_460	CA_334
CA_106	CA_544	CA_247	CA_315
CA_352	CA_430	CA_355
CA_434	CA_090	CA_389	CA_527	CA_590
CA_099	CA_355	CA_395
CA_319	CA_364	CA_417
CA_351	CA_044	CA_123
CA_101	CA_202	CA_297
CA_136	CA_427	CA_286
CA_450	CA_554	CA_293	CA_101	CA_211
CA_080	CA_262	CA_199	CA_212
CA_464	CA_192	CA_251	CA_174	CA_489
CA_032	CA_264	CA_270
CA_061	CA_205	CA_279
CA_581	CA_120	CA_416	CA_233	CA_345	CA_505	CA_580
CA_173	CA_220
CA_217	CA_300	CA_249
CA_219	CA_247
CA_111	CA_286
CA_184	CA_189
CA_197	CA_169
CA_110	CA_433
CA_410	CA_131	CA_167
CA_375	CA_417	CA_169
CA_513	CA_304	CA_423	CA_003	CA_032	CA_106
CA_101	CA_450	CA_202	CA_211	CA_103	CA_411
CA_577	CA_271	CA_144	CA_145
CA_130	CA_097	CA_007	CA_276
CA_474	CA_089	CA_193	CA_079
CA_158	CA_584	CA_101	CA_202	CA_297
CA_417	CA_409	CA_553	CA_105	CA_187
CA_107	CA_254	CA_395	CA_355
CA_327	CA_571	CA_275	CA_568	CA_214
CA_439	CA_434
CA_281	CA_034
CA_359	CA_471	CA_058
CA_226	CA_295	CA_562	CA_446
CA_252	CA_485
CA_219	CA_385	CA_247
CA_557	CA_414	CA_038	CA_461	CA_106
CA_465	CA_302	CA_148	CA_463	CA_585
CA_557	CA_403	CA_106
CA_517	CA_039	CA_300	CA_231
CA_206	CA_063
CA_280	CA_259	CA_246	CA_530
CA_017	CA_565	CA_096
CA_481	CA_500
CA_512	CA_372	CA_228	CA_040	CA_342
CA_300	CA_191	CA_559
CA_300	CA_355
CA_189	CA_106
CA_284	CA_496	CA_113
CA_369	CA_202	CA_101
CA_106	CA_309
CA_498	CA_292
CA_149	CA_342
CA_115	CA_498
CA_244	CA_345	CA_591
CA_048	CA_115	CA_498
CA_511	CA_052
CA_338	CA_065
CA_486	CA_408
CA_296	CA_025
CA_544	CA_106
CA_106	CA_544
CA_173	CA_086	CA_394
CA_189	CA_106
CA_558	CA_189	CA_587
CA_183	CA_502
CA_402	CA_566	CA_186	CA_547
CA_468	CA_266	CA_524
CA_444	CA_352
CA_200	CA_146	CA_370	CA_372	CA_421	CA_540
CA_382	CA_372
CA_347	CA_588
CA_108	CA_188
CA_335	CA_545
CA_233	CA_416	CA_345	CA_398	CA_392	CA_120
CA_522	CA_085	CA_126	CA_365
CA_522	CA_126
CA_434	CA_090
CA_406	CA_152	CA_057
CA_202	CA_101	CA_369
CA_083	CA_067
CA_151	CA_350	CA_300
CA_575	CA_237
CA_087	CA_334
CA_106	CA_544
CA_375	CA_344
CA_178	CA_286	CA_222	CA_016
CA_338	CA_420	CA_155
CA_430	CA_107	CA_380	CA_355
CA_458	CA_032
CA_346	CA_525
CA_147	CA_384
CA_457	CA_516
CA_343	CA_502	CA_091
CA_494	CA_377
CA_482	CA_247	CA_021
CA_448	CA_567
CA_362	CA_292
CA_503	CA_241
CA_131	CA_167
CA_081	CA_070	CA_482
CA_169	CA_375	CA_331	CA_344
CA_405	CA_292
CA_492	CA_535	CA_441
CA_292	CA_066	CA_504
CA_505	CA_244	CA_398	CA_378
CA_244	CA_240	CA_573
CA_570	CA_363
CA_006	CA_329	CA_520	CA_534	CA_119	CA_579	CA_467
CA_154	CA_059	CA_179
CA_340	CA_425	CA_356	CA_361	CA_472
CA_384	CA_288	CA_582	CA_074	CA_147	CA_527	CA_069
CA_152	CA_057	CA_406
CA_189	CA_181	CA_106
CA_021	CA_406	CA_152	CA_319	CA_147	CA_417	CA_239	CA_576	CA_225	CA_524	CA_364
CA_375	CA_417	CA_046	CA_131	CA_132	CA_543	CA_441	CA_070	CA_533	CA_519	CA_282	CA_575	CA_478	CA_406	CA_074	CA_111	CA_525	CA_384	CA_092	CA_488	CA_319	CA_179	CA_349	CA_526	CA_346	CA_239	CA_308	CA_470	CA_350	CA_545	CA_151	CA_333	CA_152	CA_086	CA_582
CA_106	CA_288	CA_300	CA_069	CA_177	CA_355	CA_231	CA_364	CA_287	CA_216	CA_380	CA_401	CA_533	CA_575	CA_018	CA_453	CA_178	CA_022	CA_503	CA_395	CA_446	CA_107	CA_049	CA_527	CA_390	CA_334	CA_546
CA_021	CA_576	CA_225	CA_077	CA_098	CA_218	CA_377	CA_064	CA_147	CA_574	CA_136	CA_560	CA_556	CA_539	CA_479	CA_170	CA_247	CA_286
CA_592	CA_570	CA_129	CA_401	CA_147	CA_021	CA_583	CA_332	CA_162
CA_592	CA_083	CA_570
CA_196	CA_026
CA_503	CA_586	CA_550	CA_219
CA_046	CA_426	CA_430	CA_377
CA_149	CA_342
CA_323	CA_014
CA_335	CA_286
CA_539	CA_247
CA_405	CA_586	CA_189
CA_252	CA_045
CA_524	CA_424	CA_266	CA_432	CA_220
CA_174	CA_489	CA_285	CA_272
CA_211	CA_450	CA_293	CA_383	CA_487
CA_221	CA_012	CA_255	CA_178	CA_068
CA_106	CA_195	CA_339	CA_374
CA_528	CA_400
CA_456	CA_224
CA_442	CA_455	CA_311	CA_167	CA_307	CA_131
CA_460	CA_379	CA_161	CA_334	CA_087
CA_106	CA_544
CA_380	CA_254	CA_355	CA_099	CA_260	CA_395
CA_405	CA_552	CA_322	CA_265	CA_393
CA_234	CA_508	CA_541	CA_121	CA_002
CA_501	CA_028
CA_107	CA_254
CA_417	CA_594	CA_462	CA_358	CA_483	CA_314
CA_582	CA_384	CA_527	CA_147	CA_288	CA_074	CA_069
CA_205	CA_315	CA_279
CA_519	CA_179	CA_294	CA_069
CA_476	CA_485	CA_454	CA_253	CA_250	CA_324
CA_189	CA_539
CA_230	CA_300	CA_249	CA_399
CA_537	CA_371	CA_116
CA_552	CA_265	CA_322	CA_393	CA_405
CA_384	CA_179	CA_519
CA_449	CA_403	CA_374
CA_072	CA_236	CA_175
CA_294	CA_519	CA_384	CA_179
CA_210	CA_110	CA_298	CA_300	CA_538
CA_101	CA_202	CA_084
CA_269	CA_531	CA_476
CA_163	CA_273	CA_428	CA_509
CA_319	CA_267	CA_168	CA_176	CA_043	CA_117	CA_438	CA_223
CA_357	CA_060	CA_114	CA_093
CA_245	CA_213	CA_523	CA_313
CA_278	CA_578	CA_274
CA_156	CA_443	CA_514
CA_147	CA_141	CA_556	CA_021	CA_317
CA_151	CA_109	CA_480	CA_301	CA_172
CA_388	CA_451	CA_417
CA_112	CA_359	CA_058
CA_288	CA_147	CA_177	CA_556	CA_182
CA_418	CA_068	CA_178	CA_075	CA_277
CA_446	CA_562
CA_261	CA_490	CA_079
CA_263	CA_050
CA_133	CA_281
CA_357	CA_114	CA_493	CA_060
CA_268	CA_031	CA_459
CA_137	CA_262
CA_353	CA_134
CA_032	CA_106
CA_019	CA_265	CA_009
CA_076	CA_470	CA_046	CA_092	CA_488
CA_126	CA_027
CA_348	CA_053	CA_004
CA_542	CA_572
CA_087	CA_413	CA_190	CA_460	CA_334
CA_032	CA_106	CA_264	CA_507
CA_166	CA_497
CA_235	CA_196
CA_139	CA_252	CA_056
CA_211	CA_450	CA_033	CA_103	CA_487
CA_138	CA_125
CA_306	CA_337	CA_095	CA_001	CA_491	CA_320
CA_404	CA_229	CA_203	CA_281
CA_310	CA_328	CA_407
CA_471	CA_209	CA_058
CA_582	CA_390	CA_408	CA_051
CA_517	CA_563	CA_521	CA_039	CA_231	CA_300
CA_102	CA_164
CA_396	CA_440	CA_220
CA_567	CA_015	CA_354
CA_405	CA_552	CA_322	CA_393	CA_010	CA_586	CA_331	CA_595	CA_265
CA_515	CA_231	CA_039	CA_517	CA_300
CA_376	CA_373
CA_517	CA_039	CA_300	CA_231
CA_439	CA_434
CA_219	CA_385	CA_247
CA_465	CA_302	CA_148	CA_463	CA_585
CA_517	CA_039	CA_300	CA_231
CA_206	CA_063
CA_280	CA_259	CA_246	CA_530
CA_017	CA_565	CA_096
CA_557	CA_414	CA_038	CA_461	CA_106
CA_557	CA_403	CA_106
CA_405	CA_030	CA_247
CA_441	CA_551	CA_258
CA_316	CA_165
CA_499	CA_169
CA_150	CA_069	CA_390
CA_549	CA_291	CA_415
CA_360	CA_140
CA_334	CA_473
CA_502	CA_300
CA_140	CA_037
CA_502	CA_300
CA_143	CA_055	CA_503
CA_300	CA_355	CA_503
CA_051	CA_100
CA_051	CA_100
CA_143	CA_055
CA_548	CA_140
CA_355	CA_300	CA_502
CA_431	CA_360	CA_104
CA_037	CA_198
CA_227	CA_360
CA_140	CA_062
CA_286	CA_047
CA_381	CA_258
CA_390	CA_290	CA_150	CA_069
CA_343	CA_502
CA_502	CA_343
CA_189	CA_247
CA_377	CA_422
CA_334	CA_473
CA_086	CA_142	CA_029
CA_581	CA_377	CA_422
CA_143	CA_055	CA_128
CA_143	CA_055	CA_169
CA_169	CA_292
CA_355	CA_312
CA_305	CA_167	CA_047
CA_487	CA_169
CA_343	CA_502
CA_300	CA_355	CA_231
CA_441	CA_286
CA_223	CA_377
CA_336	CA_055
CA_292	CA_242
CA_243	CA_318
CA_021	CA_243	CA_372
CA_300	CA_191	CA_232
CA_290	CA_238
CA_300	CA_191	CA_232
CA_581	CA_377	CA_422
CA_518	CA_422
CA_395	CA_018
CA_405	CA_529
CA_030	CA_550
CA_247	CA_021
CA_318	CA_242
CA_279	CA_422
CA_292	CA_362
CA_343	CA_502
CA_355	CA_300	CA_191
CA_435	CA_391	CA_258	CA_005	CA_381
CA_188	CA_108
CA_024	CA_498
CA_041	CA_303	CA_035	CA_401
CA_084	CA_292
CA_390	CA_510
CA_279	CA_593
CA_433	CA_057
CA_160	CA_561
CA_219
CA_602
CA_601
CA_319
CA_600
CA_599
CA_405
CA_169
CA_265
CA_598
CA_586
CA_503
CA_401
CA_601
CA_286
CA_597
CA_205
CA_405
CA_174
CA_032
CA_032
CA_032
CA_596
CA_499
CA_290
CA_057
CA_503
CA_603
CA_316
CA_057
CA_051
CA_242
CA_140
CA_189
CA_140
CA_242
CA_604
CA_008
CA_162
CA_181
CA_181
CA_189
CA_189
CA_605
CA_021
CA_057
CA_550
CA_189
CA_355
CA_355
CA_606
CA_189
CA_499
CA_355
CA_318
CA_503
CA_282
CA_282
CA_607
CA_503
CA_488
CA_405
CA_292
CA_323
CA_169
CA_247
CA_405
CA_292
CA_608
CA_609
CA_427
CA_401
CA_610
CA_140
CA_611
CA_405
CA_608
CA_550
CA_406
CA_612
CA_570
CA_086
CA_010
CA_189
CA_611
CA_545
CA_613
CA_292
CA_614
CA_169
CA_375
CA_567
CA_405
CA_609
CA_131
CA_401
CA_427
CA_106
CA_401
CA_375
CA_106
CA_540
CA_615
CA_616
CA_106
CA_560
CA_586
CA_539
CA_106
CA_286
CA_446
CA_344
CA_570
CA_355
CA_006

## Sheet: raw_network_SAJH
SAJH: Authors (coded) for network analysis
SA_001	SA_518	SA_863	SA_304	SA_426	SA_230	SA_192	SA_380	SA_630	SA_045	SA_028	SA_866	SA_757	SA_763	SA_562	SA_080	SA_369
SA_432	SA_589	SA_555	SA_052	SA_083	SA_121	SA_366	SA_194	SA_199	SA_449	SA_328	SA_089	SA_397	SA_190	SA_856	SA_139
SA_170	SA_065	SA_837	SA_420	SA_254	SA_713	SA_093	SA_535	SA_521	SA_345	SA_543	SA_212	SA_322
SA_740	SA_014	SA_133	SA_545	SA_270	SA_391	SA_465	SA_688	SA_137	SA_584	SA_442	SA_504	SA_142
SA_786	SA_448	SA_675	SA_599	SA_525	SA_845	SA_016	SA_205	SA_494	SA_833	SA_361	SA_612
SA_432	SA_458	SA_083	SA_589	SA_210	SA_775	SA_580	SA_238	SA_139
SA_817	SA_857	SA_692	SA_198	SA_613	SA_492	SA_839	SA_529
SA_810	SA_537	SA_590	SA_002	SA_671	SA_006	SA_201	SA_415
SA_501	SA_267	SA_445	SA_249	SA_567	SA_436	SA_653	SA_155
SA_676	SA_708	SA_531	SA_612	SA_307	SA_865	SA_856	SA_015
SA_755	SA_752	SA_466	SA_285	SA_279	SA_144	SA_788
SA_669	SA_108	SA_659	SA_341	SA_355	SA_628	SA_665
SA_370	SA_692	SA_491	SA_099	SA_615	SA_283	SA_524
SA_182	SA_327	SA_773	SA_213	SA_762	SA_473	SA_446
SA_576	SA_751	SA_146	SA_441	SA_713	SA_636	SA_281
SA_812	SA_582	SA_240	SA_617	SA_104	SA_612	SA_113
SA_537	SA_006	SA_835	SA_488	SA_596	SA_810
SA_098	SA_742	SA_020	SA_094	SA_475	SA_810
SA_287	SA_599	SA_530	SA_065	SA_131	SA_612
SA_274	SA_710	SA_840	SA_085	SA_220	SA_592
SA_469	SA_743	SA_777	SA_113	SA_582	SA_551
SA_674	SA_768	SA_385	SA_590	SA_410	SA_537
SA_132	SA_541	SA_742	SA_654	SA_495	SA_503
SA_556	SA_117	SA_332	SA_317	SA_227	SA_416
SA_746	SA_498	SA_013	SA_806	SA_475	SA_414
SA_417	SA_600	SA_024	SA_300	SA_221	SA_397
SA_200	SA_645	SA_741	SA_254	SA_747	SA_359
SA_340	SA_041	SA_078	SA_191	SA_809	SA_322
SA_689	SA_810	SA_070	SA_750	SA_459	SA_222
SA_673	SA_582	SA_187	SA_113	SA_397	SA_218
SA_776	SA_646	SA_748	SA_408	SA_775	SA_166
SA_715	SA_224	SA_457	SA_301	SA_072	SA_161
SA_262	SA_219	SA_214	SA_283	SA_529	SA_004
SA_064	SA_624	SA_189	SA_635	SA_830
SA_152	SA_770	SA_419	SA_602	SA_798
SA_848	SA_513	SA_026	SA_482	SA_797
SA_375	SA_312	SA_513	SA_209	SA_797
SA_844	SA_513	SA_027	SA_482	SA_797
SA_777	SA_841	SA_159	SA_476	SA_735
SA_071	SA_181	SA_394	SA_730	SA_732
SA_711	SA_771	SA_214	SA_086	SA_714
SA_211	SA_738	SA_766	SA_293	SA_703
SA_610	SA_175	SA_750	SA_800	SA_689
SA_253	SA_389	SA_509	SA_665	SA_669
SA_544	SA_828	SA_360	SA_261	SA_665
SA_308	SA_297	SA_855	SA_831	SA_647
SA_193	SA_386	SA_019	SA_591	SA_586
SA_657	SA_203	SA_499	SA_362	SA_565
SA_038	SA_390	SA_816	SA_314	SA_531
SA_676	SA_842	SA_139	SA_307	SA_531
SA_241	SA_395	SA_047	SA_060	SA_512
SA_780	SA_616	SA_639	SA_333	SA_483
SA_449	SA_834	SA_339	SA_810	SA_432
SA_120	SA_054	SA_141	SA_554	SA_432
SA_575	SA_487	SA_685	SA_664	SA_431
SA_114	SA_460	SA_409	SA_434	SA_426
SA_166	SA_422	SA_577	SA_337	SA_413
SA_295	SA_631	SA_570	SA_107	SA_402
SA_595	SA_097	SA_356	SA_185	SA_391
SA_232	SA_100	SA_836	SA_421	SA_376
SA_794	SA_170	SA_108	SA_628	SA_348
SA_321	SA_784	SA_036	SA_546	SA_299
SA_840	SA_799	SA_005	SA_076	SA_274
SA_694	SA_759	SA_805	SA_746	SA_256
SA_373	SA_351	SA_611	SA_286	SA_243
SA_850	SA_574	SA_265	SA_640	SA_202
SA_672	SA_523	SA_284	SA_034	SA_199
SA_316	SA_447	SA_439	SA_605	SA_157
SA_178	SA_437	SA_634	SA_508	SA_139
SA_508	SA_248	SA_634	SA_505	SA_139
SA_811	SA_195	SA_403	SA_620	SA_118
SA_825	SA_317	SA_075	SA_500	SA_117
SA_021	SA_709	SA_116	SA_582	SA_113
SA_440	SA_649	SA_627	SA_206	SA_053
SA_593	SA_330	SA_472	SA_654	SA_018
SA_626	SA_654	SA_271	SA_593	SA_018
SA_497	SA_096	SA_109	SA_834
SA_672	SA_590	SA_429	SA_810
SA_733	SA_713	SA_441	SA_783
SA_676	SA_118	SA_789	SA_782
SA_250	SA_172	SA_511	SA_781
SA_684	SA_303	SA_013	SA_746
SA_679	SA_462	SA_730	SA_732
SA_655	SA_821	SA_148	SA_729
SA_645	SA_777	SA_622	SA_721
SA_381	SA_212	SA_398	SA_718
SA_214	SA_043	SA_849	SA_714
SA_716	SA_149	SA_771	SA_711
SA_087	SA_774	SA_803	SA_699
SA_262	SA_004	SA_808	SA_689
SA_412	SA_515	SA_540	SA_689
SA_280	SA_074	SA_296	SA_689
SA_273	SA_215	SA_477	SA_687
SA_234	SA_244	SA_714	SA_642
SA_785	SA_173	SA_464	SA_629
SA_853	SA_625	SA_136	SA_619
SA_599	SA_287	SA_066	SA_612
SA_038	SA_314	SA_122	SA_559
SA_560	SA_464	SA_737	SA_550
SA_659	SA_196	SA_322	SA_535
SA_816	SA_310	SA_522	SA_531
SA_528	SA_707	SA_720	SA_514
SA_843	SA_585	SA_383	SA_502
SA_269	SA_606	SA_607	SA_497
SA_472	SA_349	SA_022	SA_471
SA_712	SA_382	SA_739	SA_461
SA_156	SA_007	SA_764	SA_426
SA_670	SA_251	SA_731	SA_348
SA_309	SA_404	SA_536	SA_348
SA_056	SA_166	SA_428	SA_331
SA_360	SA_852	SA_319	SA_326
SA_516	SA_276	SA_461	SA_324
SA_719	SA_325	SA_023	SA_313
SA_057	SA_756	SA_750	SA_306
SA_807	SA_638	SA_245	SA_302
SA_378	SA_761	SA_305	SA_292
SA_158	SA_289	SA_532	SA_290
SA_601	SA_124	SA_405	SA_258
SA_116	SA_124	SA_696	SA_246
SA_658	SA_298	SA_401	SA_242
SA_031	SA_547	SA_291	SA_239
SA_150	SA_123	SA_365	SA_238
SA_397	SA_218	SA_641	SA_237
SA_163	SA_579	SA_404	SA_237
SA_058	SA_585	SA_347	SA_231
SA_702	SA_474	SA_371	SA_228
SA_125	SA_702	SA_095	SA_228
SA_397	SA_377	SA_143	SA_218
SA_387	SA_353	SA_677	SA_217
SA_730	SA_165	SA_082	SA_204
SA_314	SA_038	SA_035	SA_188
SA_364	SA_367	SA_864	SA_177
SA_534	SA_751	SA_542	SA_176
SA_736	SA_722	SA_836	SA_145
SA_068	SA_312	SA_822	SA_110
SA_385	SA_862	SA_372	SA_106
SA_258	SA_405	SA_138	SA_103
SA_813	SA_587	SA_615	SA_073
SA_354	SA_055	SA_704	SA_070
SA_025	SA_537	SA_768	SA_053
SA_529	SA_272	SA_651	SA_040
SA_358	SA_478	SA_724	SA_033
SA_793	SA_598	SA_597	SA_018
SA_247	SA_528	SA_207	SA_009
SA_118	SA_180	SA_861
SA_186	SA_417	SA_860
SA_350	SA_481	SA_859
SA_430	SA_088	SA_851
SA_109	SA_102	SA_834
SA_801	SA_032	SA_827
SA_288	SA_510	SA_820
SA_345	SA_444	SA_819
SA_345	SA_444	SA_819
SA_538	SA_832	SA_816
SA_835	SA_701	SA_810
SA_418	SA_393	SA_804
SA_275	SA_166	SA_796
SA_568	SA_663	SA_781
SA_744	SA_558	SA_777
SA_535	SA_329	SA_753
SA_357	SA_153	SA_749
SA_166	SA_056	SA_748
SA_847	SA_742	SA_746
SA_621	SA_656	SA_734
SA_254	SA_645	SA_725
SA_234	SA_642	SA_714
SA_389	SA_539	SA_714
SA_771	SA_214	SA_714
SA_385	SA_815	SA_705
SA_135	SA_055	SA_704
SA_363	SA_011	SA_704
SA_011	SA_411	SA_704
SA_520	SA_039	SA_691
SA_450	SA_750	SA_689
SA_669	SA_828	SA_665
SA_664	SA_067	SA_662
SA_352	SA_489	SA_661
SA_489	SA_259	SA_661
SA_109	SA_529	SA_651
SA_346	SA_512	SA_650
SA_668	SA_517	SA_648
SA_140	SA_443	SA_648
SA_668	SA_486	SA_648
SA_535	SA_725	SA_645
SA_235	SA_098	SA_644
SA_768	SA_838	SA_637
SA_619	SA_406	SA_632
SA_645	SA_777	SA_622
SA_700	SA_342	SA_615
SA_700	SA_343	SA_615
SA_717	SA_614	SA_612
SA_130	SA_599	SA_612
SA_507	SA_549	SA_585
SA_698	SA_843	SA_585
SA_225	SA_843	SA_585
SA_379	SA_843	SA_585
SA_506	SA_266	SA_585
SA_004	SA_849	SA_573
SA_352	SA_489	SA_561
SA_197	SA_484	SA_559
SA_223	SA_112	SA_557
SA_048	SA_791	SA_552
SA_632	SA_608	SA_546
SA_858	SA_686	SA_541
SA_666	SA_572	SA_535
SA_455	SA_571	SA_535
SA_109	SA_834	SA_529
SA_818	SA_153	SA_529
SA_707	SA_772	SA_528
SA_167	SA_392	SA_519
SA_689	SA_412	SA_515
SA_834	SA_109	SA_515
SA_396	SA_127	SA_512
SA_842	SA_742	SA_505
SA_117	SA_581	SA_500
SA_834	SA_109	SA_497
SA_252	SA_778	SA_467
SA_451	SA_368	SA_463
SA_162	SA_282	SA_461
SA_727	SA_452	SA_438
SA_790	SA_580	SA_432
SA_537	SA_385	SA_429
SA_548	SA_826	SA_428
SA_417	SA_030	SA_397
SA_569	SA_512	SA_396
SA_535	SA_645	SA_359
SA_151	SA_535	SA_359
SA_667	SA_708	SA_358
SA_623	SA_183	SA_345
SA_792	SA_344	SA_338
SA_170	SA_254	SA_336
SA_092	SA_029	SA_335
SA_179	SA_294	SA_322
SA_527	SA_742	SA_296
SA_260	SA_044	SA_294
SA_004	SA_318	SA_294
SA_109	SA_357	SA_283
SA_357	SA_754	SA_283
SA_433	SA_037	SA_278
SA_049	SA_563	SA_277
SA_049	SA_563	SA_277
SA_826	SA_766	SA_275
SA_119	SA_723	SA_257
SA_828	SA_261	SA_256
SA_633	SA_268	SA_256
SA_731	SA_147	SA_255
SA_397	SA_218	SA_237
SA_702	SA_129	SA_229
SA_609	SA_474	SA_228
SA_528	SA_454	SA_216
SA_829	SA_634	SA_202
SA_668	SA_059	SA_184
SA_119	SA_257	SA_174
SA_748	SA_619	SA_166
SA_736	SA_836	SA_160
SA_665	SA_643	SA_139
SA_468	SA_771	SA_139
SA_665	SA_081	SA_126
SA_760	SA_787	SA_124
SA_824	SA_823	SA_118
SA_180	SA_164	SA_118
SA_416	SA_332	SA_117
SA_134	SA_274	SA_116
SA_425	SA_553	SA_116
SA_096	SA_357	SA_109
SA_357	SA_495	SA_109
SA_681	SA_079	SA_091
SA_334	SA_384	SA_090
SA_470	SA_164	SA_077
SA_689	SA_008	SA_063
SA_188	SA_668	SA_038
SA_314	SA_559	SA_038
SA_547	SA_239	SA_031
SA_453	SA_461	SA_018
SA_682	SA_697	SA_010
SA_528	SA_247	SA_009
SA_594	SA_115	SA_004
SA_278	SA_456	SA_003
SA_170	SA_612
SA_678	SA_779
SA_680	SA_730
SA_414	SA_388
SA_660	SA_072
SA_166	SA_275
SA_292	SA_017
SA_212	SA_579
SA_119	SA_424
SA_505	SA_139
SA_018	SA_535
SA_588	SA_407
SA_526	SA_618
SA_535	SA_315
SA_335	SA_758
SA_217	SA_012
SA_604	SA_846
SA_423	SA_348
SA_111	SA_263
SA_730	SA_603
SA_490	SA_069
SA_168	SA_645
SA_275	SA_726
SA_578	SA_690
SA_372	SA_862
SA_745	SA_323
SA_676	SA_169
SA_765	SA_695
SA_223	SA_399
SA_437	SA_139
SA_046	SA_493
SA_827	SA_202
SA_479	SA_645
SA_109	SA_495
SA_105	SA_118
SA_480	SA_645
SA_693	SA_154
SA_435	SA_508
SA_207	SA_528
SA_153	SA_096
SA_539	SA_236
SA_652	SA_320
SA_531	SA_816
SA_051	SA_767
SA_011	SA_704
SA_084	SA_208
SA_814	SA_519
SA_480	SA_645
SA_311	SA_704
SA_427	SA_566
SA_623	SA_645
SA_101	SA_264
SA_171	SA_061
SA_867	SA_233
SA_802	SA_374
SA_283	SA_496
SA_042	SA_062
SA_136	SA_619
SA_854	SA_038
SA_620	SA_683
SA_583	SA_050
SA_128	SA_228
SA_867	SA_233
SA_867	SA_233
SA_226	SA_485
SA_508	SA_139
SA_649	SA_440
SA_484	SA_197
SA_728	SA_769
SA_564	SA_580
SA_223	SA_400
SA_101	SA_504
SA_868	SA_795	SA_348	SA_665	SA_615	SA_283	SA_524
SA_619
SA_428
SA_867
SA_147
SA_869
SA_273
SA_867
SA_223
SA_870
SA_438
SA_871
SA_815

## Sheet: authors_CHER
CHER: Author´s gender
ID	Gender
CA_001	H
CA_002	H
CA_003	H
CA_004	M
CA_005	H
CA_006	H
CA_007	H
CA_008	M
CA_009	M
CA_010	M
CA_011	H
CA_012	M
CA_013	M
CA_014	H
CA_015	H
CA_016	H
CA_017	H
CA_018	M
CA_019	M
CA_020	H
CA_021	H
CA_022	H
CA_023	H
CA_024	H
CA_025	H
CA_026	H
CA_027	M
CA_028	H
CA_029	H
CA_030	M
CA_031	H
CA_032	H
CA_033	H
CA_034	M
CA_035	M
CA_036	M
CA_037	M
CA_038	M
CA_039	M
CA_040	M
CA_041	M
CA_042	M
CA_043	M
CA_044	M
CA_045	M
CA_046	H
CA_047	H
CA_048	H
CA_049	H
CA_050	H
CA_051	H
CA_052	H
CA_053	M
CA_054	H
CA_055	H
CA_056	H
CA_057	H
CA_058	H
CA_059	H
CA_060	H
CA_061	H
CA_062	M
CA_063	M
CA_064	M
CA_065	M
CA_066	M
CA_067	M
CA_068	M
CA_069	M
CA_070	H
CA_071	H
CA_072	H
CA_073	H
CA_074	M
CA_075	M
CA_076	M
CA_077	M
CA_078	H
CA_079	H
CA_080	H
CA_081	H
CA_082	H
CA_083	H
CA_084	H
CA_085	H
CA_086	M
CA_087	M
CA_088	M
CA_089	M
CA_090	M
CA_091	M
CA_092	M
CA_093	H
CA_094	H
CA_095	H
CA_096	M
CA_097	H
CA_098	M
CA_099	M
CA_100	M
CA_101	H
CA_102	H
CA_103	H
CA_104	H
CA_105	H
CA_106	H
CA_107	H
CA_108	M
CA_109	M
CA_110	M
CA_111	M
CA_112	M
CA_113	H
CA_114	H
CA_115	H
CA_116	H
CA_117	M
CA_118	M
CA_119	M
CA_120	M
CA_121	H
CA_122	H
CA_123	H
CA_124	H
CA_125	H
CA_126	H
CA_127	M
CA_128	M
CA_129	M
CA_130	M
CA_131	M
CA_132	M
CA_133	M
CA_134	M
CA_135	M
CA_136	M
CA_137	M
CA_138	M
CA_139	M
CA_140	M
CA_141	H
CA_142	M
CA_143	M
CA_144	M
CA_145	M
CA_146	H
CA_147	H
CA_148	H
CA_149	H
CA_150	H
CA_151	H
CA_152	H
CA_153	M
CA_154	M
CA_155	M
CA_156	H
CA_157	H
CA_158	M
CA_159	H
CA_160	H
CA_161	H
CA_162	H
CA_163	H
CA_164	H
CA_165	H
CA_166	H
CA_167	H
CA_168	H
CA_169	H
CA_170	M
CA_171	M
CA_172	H
CA_173	H
CA_174	H
CA_175	H
CA_176	H
CA_177	H
CA_178	H
CA_179	H
CA_180	H
CA_181	H
CA_182	M
CA_183	M
CA_184	H
CA_185	H
CA_186	H
CA_187	H
CA_188	H
CA_189	H
CA_190	H
CA_191	H
CA_192	H
CA_193	H
CA_194	M
CA_195	H
CA_196	M
CA_197	H
CA_198	H
CA_199	H
CA_200	H
CA_201	H
CA_202	H
CA_203	H
CA_204	H
CA_205	H
CA_206	H
CA_207	H
CA_208	H
CA_209	H
CA_210	H
CA_211	H
CA_212	H
CA_213	H
CA_214	H
CA_215	M
CA_216	M
CA_217	M
CA_218	M
CA_219	M
CA_220	M
CA_221	M
CA_222	M
CA_223	H
CA_224	H
CA_225	M
CA_226	H
CA_227	M
CA_228	M
CA_229	M
CA_230	M
CA_231	M
CA_232	M
CA_233	H
CA_234	H
CA_235	M
CA_236	H
CA_237	H
CA_238	H
CA_239	H
CA_240	H
CA_241	H
CA_242	H
CA_243	H
CA_244	H
CA_245	H
CA_246	H
CA_247	H
CA_248	H
CA_249	H
CA_250	M
CA_251	H
CA_252	H
CA_253	H
CA_254	H
CA_255	H
CA_256	M
CA_257	M
CA_258	H
CA_259	H
CA_260	H
CA_261	H
CA_262	H
CA_263	H
CA_264	H
CA_265	H
CA_266	H
CA_267	H
CA_268	H
CA_269	H
CA_270	H
CA_271	M
CA_272	H
CA_273	H
CA_274	H
CA_275	H
CA_276	H
CA_277	H
CA_278	H
CA_279	H
CA_280	H
CA_281	H
CA_282	H
CA_283	H
CA_284	H
CA_285	H
CA_286	H
CA_287	M
CA_288	H
CA_289	H
CA_290	H
CA_291	H
CA_292	H
CA_293	H
CA_294	H
CA_295	H
CA_296	H
CA_297	H
CA_298	H
CA_299	H
CA_300	H
CA_301	H
CA_302	H
CA_303	H
CA_304	H
CA_305	H
CA_306	H
CA_307	H
CA_308	H
CA_309	H
CA_310	H
CA_311	H
CA_312	H
CA_313	H
CA_314	H
CA_315	H
CA_316	H
CA_317	H
CA_318	H
CA_319	H
CA_320	H
CA_321	H
CA_322	H
CA_323	H
CA_324	M
CA_325	M
CA_326	M
CA_327	M
CA_328	M
CA_329	M
CA_330	M
CA_331	M
CA_332	M
CA_333	M
CA_334	M
CA_335	H
CA_336	H
CA_337	H
CA_338	H
CA_339	H
CA_340	H
CA_341	M
CA_342	M
CA_343	M
CA_344	M
CA_345	M
CA_346	M
CA_347	M
CA_348	M
CA_349	M
CA_350	M
CA_351	H
CA_352	M
CA_353	M
CA_354	M
CA_355	H
CA_356	H
CA_357	H
CA_358	H
CA_359	H
CA_360	H
CA_361	H
CA_362	H
CA_363	H
CA_364	H
CA_365	H
CA_366	H
CA_367	H
CA_368	H
CA_369	H
CA_370	H
CA_371	H
CA_372	H
CA_373	H
CA_374	H
CA_375	H
CA_376	M
CA_377	M
CA_378	M
CA_379	M
CA_380	M
CA_381	M
CA_382	M
CA_383	M
CA_384	M
CA_385	M
CA_386	M
CA_387	M
CA_388	M
CA_389	M
CA_390	M
CA_391	M
CA_392	M
CA_393	M
CA_394	M
CA_395	M
CA_396	M
CA_397	M
CA_398	H
CA_399	M
CA_400	M
CA_401	H
CA_402	H
CA_403	H
CA_404	H
CA_405	M
CA_406	M
CA_407	M
CA_408	M
CA_409	H
CA_410	H
CA_411	H
CA_412	H
CA_413	H
CA_414	H
CA_415	M
CA_416	M
CA_417	H
CA_418	M
CA_419	M
CA_420	M
CA_421	M
CA_422	M
CA_423	M
CA_424	H
CA_425	M
CA_426	H
CA_427	H
CA_428	H
CA_429	M
CA_430	M
CA_431	M
CA_432	M
CA_433	M
CA_434	M
CA_435	M
CA_436	M
CA_437	M
CA_438	M
CA_439	M
CA_440	H
CA_441	H
CA_442	H
CA_443	H
CA_444	H
CA_445	H
CA_446	H
CA_447	M
CA_448	M
CA_449	M
CA_450	M
CA_451	M
CA_452	M
CA_453	M
CA_454	H
CA_455	M
CA_456	H
CA_457	H
CA_458	H
CA_459	H
CA_460	H
CA_461	H
CA_462	H
CA_463	H
CA_464	H
CA_465	H
CA_466	H
CA_467	H
CA_468	H
CA_469	H
CA_470	M
CA_471	M
CA_472	M
CA_473	H
CA_474	H
CA_475	H
CA_476	H
CA_477	M
CA_478	M
CA_479	M
CA_480	M
CA_481	H
CA_482	H
CA_483	H
CA_484	H
CA_485	H
CA_486	H
CA_487	H
CA_488	H
CA_489	H
CA_490	H
CA_491	H
CA_492	M
CA_493	M
CA_494	M
CA_495	H
CA_496	H
CA_497	H
CA_498	H
CA_499	H
CA_500	H
CA_501	H
CA_502	H
CA_503	H
CA_504	H
CA_505	H
CA_506	H
CA_507	H
CA_508	H
CA_509	H
CA_510	H
CA_511	H
CA_512	H
CA_513	H
CA_514	H
CA_515	H
CA_516	H
CA_517	H
CA_518	H
CA_519	H
CA_520	H
CA_521	H
CA_522	H
CA_523	M
CA_524	M
CA_525	M
CA_526	M
CA_527	M
CA_528	H
CA_529	M
CA_530	H
CA_531	H
CA_532	M
CA_533	M
CA_534	M
CA_535	M
CA_536	M
CA_537	H
CA_538	H
CA_539	H
CA_540	H
CA_541	H
CA_542	H
CA_543	H
CA_544	H
CA_545	H
CA_546	H
CA_547	M
CA_548	M
CA_549	M
CA_550	M
CA_551	M
CA_552	M
CA_553	M
CA_554	M
CA_555	M
CA_556	M
CA_557	M
CA_558	M
CA_559	M
CA_560	M
CA_561	H
CA_562	M
CA_563	M
CA_564	M
CA_565	M
CA_566	M
CA_567	H
CA_568	M
CA_569	H
CA_570	H
CA_571	H
CA_572	M
CA_573	M
CA_574	M
CA_575	M
CA_576	M
CA_577	M
CA_578	M
CA_579	M
CA_580	M
CA_581	M
CA_582	H
CA_583	M
CA_584	M
CA_585	M
CA_586	M
CA_587	M
CA_588	M
CA_589	M
CA_590	M
CA_591	H
CA_592	H
CA_593	M
CA_594	M
CA_595	M
CA_596	M
CA_597	H
CA_598	M
CA_599	M
CA_600	H
CA_601	H
CA_602	H
CA_603	H
CA_604	H
CA_605	H
CA_606	M
CA_607	H
CA_608	M
CA_609	H
CA_610	H
CA_611	H
CA_612	M
CA_613	M
CA_614	H
CA_615	H
CA_616	M

## Sheet: authors_SAJH
SAJH: Author´s gender
ID	Gender
SA_001	H
SA_002	H
SA_003	H
SA_004	H
SA_005	M
SA_006	M
SA_007	M
SA_008	H
SA_009	M
SA_010	H
SA_011	M
SA_012	H
SA_013	H
SA_014	H
SA_015	H
SA_016	H
SA_017	H
SA_018	H
SA_019	H
SA_020	H
SA_021	M
SA_022	M
SA_023	H
SA_024	H
SA_025	H
SA_026	M
SA_027	M
SA_028	M
SA_029	M
SA_030	M
SA_031	M
SA_032	M
SA_033	M
SA_034	M
SA_035	M
SA_036	M
SA_037	M
SA_038	M
SA_039	M
SA_040	M
SA_041	M
SA_042	M
SA_043	M
SA_044	H
SA_045	H
SA_046	H
SA_047	H
SA_048	H
SA_049	M
SA_050	M
SA_051	M
SA_052	H
SA_053	H
SA_054	H
SA_055	H
SA_056	H
SA_057	H
SA_058	M
SA_059	M
SA_060	M
SA_061	M
SA_062	M
SA_063	M
SA_064	H
SA_065	H
SA_066	H
SA_067	M
SA_068	M
SA_069	H
SA_070	H
SA_071	M
SA_072	H
SA_073	H
SA_074	H
SA_075	M
SA_076	H
SA_077	M
SA_078	H
SA_079	H
SA_080	M
SA_081	M
SA_082	H
SA_083	H
SA_084	H
SA_085	H
SA_086	H
SA_087	H
SA_088	H
SA_089	H
SA_090	H
SA_091	H
SA_092	H
SA_093	M
SA_094	H
SA_095	H
SA_096	H
SA_097	H
SA_098	M
SA_099	M
SA_100	M
SA_101	M
SA_102	M
SA_103	M
SA_104	M
SA_105	M
SA_106	H
SA_107	H
SA_108	H
SA_109	H
SA_110	H
SA_111	H
SA_112	H
SA_113	H
SA_114	H
SA_115	H
SA_116	H
SA_117	H
SA_118	H
SA_119	H
SA_120	H
SA_121	H
SA_122	H
SA_123	M
SA_124	M
SA_125	M
SA_126	M
SA_127	M
SA_128	M
SA_129	M
SA_130	M
SA_131	M
SA_132	M
SA_133	M
SA_134	M
SA_135	M
SA_136	M
SA_137	M
SA_138	M
SA_139	H
SA_140	H
SA_141	H
SA_142	H
SA_143	H
SA_144	M
SA_145	M
SA_146	H
SA_147	H
SA_148	H
SA_149	H
SA_150	H
SA_151	M
SA_152	M
SA_153	M
SA_154	H
SA_155	M
SA_156	M
SA_157	M
SA_158	H
SA_159	H
SA_160	M
SA_161	M
SA_162	H
SA_163	H
SA_164	H
SA_165	H
SA_166	H
SA_167	H
SA_168	H
SA_169	H
SA_170	H
SA_171	M
SA_172	H
SA_173	M
SA_174	H
SA_175	H
SA_176	H
SA_177	H
SA_178	H
SA_179	H
SA_180	H
SA_181	H
SA_182	H
SA_183	M
SA_184	M
SA_185	H
SA_186	H
SA_187	M
SA_188	H
SA_189	M
SA_190	H
SA_191	H
SA_192	H
SA_193	H
SA_194	H
SA_195	H
SA_196	M
SA_197	M
SA_198	M
SA_199	H
SA_200	H
SA_201	H
SA_202	M
SA_203	H
SA_204	H
SA_205	M
SA_206	M
SA_207	M
SA_208	M
SA_209	H
SA_210	H
SA_211	H
SA_212	H
SA_213	H
SA_214	H
SA_215	H
SA_216	H
SA_217	H
SA_218	H
SA_219	H
SA_220	H
SA_221	H
SA_222	H
SA_223	H
SA_224	H
SA_225	M
SA_226	M
SA_227	M
SA_228	M
SA_229	M
SA_230	M
SA_231	H
SA_232	M
SA_233	M
SA_234	H
SA_235	H
SA_236	M
SA_237	H
SA_238	H
SA_239	H
SA_240	M
SA_241	M
SA_242	H
SA_243	M
SA_244	M
SA_245	H
SA_246	H
SA_247	H
SA_248	H
SA_249	H
SA_250	H
SA_251	H
SA_252	H
SA_253	H
SA_254	H
SA_255	H
SA_256	H
SA_257	H
SA_258	H
SA_259	H
SA_260	H
SA_261	H
SA_262	H
SA_263	H
SA_264	H
SA_265	M
SA_266	M
SA_267	M
SA_268	M
SA_269	M
SA_270	M
SA_271	M
SA_272	H
SA_273	H
SA_274	H
SA_275	H
SA_276	H
SA_277	H
SA_278	H
SA_279	H
SA_280	H
SA_281	H
SA_282	H
SA_283	M
SA_284	M
SA_285	H
SA_286	H
SA_287	H
SA_288	H
SA_289	H
SA_290	H
SA_291	H
SA_292	H
SA_293	H
SA_294	H
SA_295	H
SA_296	H
SA_297	H
SA_298	H
SA_299	M
SA_300	M
SA_301	M
SA_302	H
SA_303	M
SA_304	M
SA_305	H
SA_306	H
SA_307	H
SA_308	H
SA_309	M
SA_310	M
SA_311	M
SA_312	M
SA_313	M
SA_314	H
SA_315	H
SA_316	H
SA_317	M
SA_318	M
SA_319	M
SA_320	H
SA_321	M
SA_322	H
SA_323	H
SA_324	M
SA_325	H
SA_326	H
SA_327	H
SA_328	H
SA_329	H
SA_330	H
SA_331	H
SA_332	H
SA_333	H
SA_334	H
SA_335	H
SA_336	H
SA_337	H
SA_338	H
SA_339	H
SA_340	H
SA_341	H
SA_342	H
SA_343	H
SA_344	H
SA_345	H
SA_346	H
SA_347	H
SA_348	H
SA_349	H
SA_350	H
SA_351	H
SA_352	H
SA_353	H
SA_354	M
SA_355	H
SA_356	H
SA_357	H
SA_358	H
SA_359	H
SA_360	M
SA_361	M
SA_362	H
SA_363	H
SA_364	H
SA_365	H
SA_366	H
SA_367	H
SA_368	H
SA_369	H
SA_370	M
SA_371	H
SA_372	H
SA_373	H
SA_374	H
SA_375	H
SA_376	H
SA_377	H
SA_378	H
SA_379	M
SA_380	M
SA_381	H
SA_382	M
SA_383	H
SA_384	H
SA_385	H
SA_386	H
SA_387	H
SA_388	H
SA_389	H
SA_390	H
SA_391	H
SA_392	M
SA_393	H
SA_394	H
SA_395	H
SA_396	M
SA_397	H
SA_398	H
SA_399	H
SA_400	H
SA_401	H
SA_402	H
SA_403	H
SA_404	H
SA_405	H
SA_406	M
SA_407	H
SA_408	H
SA_409	H
SA_410	H
SA_411	H
SA_412	H
SA_413	H
SA_414	H
SA_415	H
SA_416	M
SA_417	H
SA_418	H
SA_419	M
SA_420	H
SA_421	H
SA_422	H
SA_423	H
SA_424	H
SA_425	H
SA_426	H
SA_427	H
SA_428	H
SA_429	H
SA_430	H
SA_431	H
SA_432	H
SA_433	H
SA_434	M
SA_435	M
SA_436	M
SA_437	M
SA_438	M
SA_439	M
SA_440	H
SA_441	H
SA_442	M
SA_443	M
SA_444	M
SA_445	M
SA_446	M
SA_447	M
SA_448	M
SA_449	M
SA_450	H
SA_451	M
SA_452	M
SA_453	M
SA_454	M
SA_455	M
SA_456	M
SA_457	M
SA_458	M
SA_459	M
SA_460	M
SA_461	M
SA_462	M
SA_463	M
SA_464	H
SA_465	H
SA_466	H
SA_467	M
SA_468	H
SA_469	H
SA_470	H
SA_471	H
SA_472	H
SA_473	H
SA_474	H
SA_475	H
SA_476	M
SA_477	M
SA_478	M
SA_479	M
SA_480	M
SA_481	M
SA_482	M
SA_483	M
SA_484	M
SA_485	M
SA_486	M
SA_487	M
SA_488	H
SA_489	H
SA_490	H
SA_491	H
SA_492	H
SA_493	M
SA_494	M
SA_495	M
SA_496	M
SA_497	M
SA_498	M
SA_499	H
SA_500	H
SA_501	M
SA_502	H
SA_503	H
SA_504	H
SA_505	H
SA_506	H
SA_507	H
SA_508	H
SA_509	M
SA_510	H
SA_511	H
SA_512	H
SA_513	M
SA_514	M
SA_515	H
SA_516	M
SA_517	H
SA_518	M
SA_519	H
SA_520	H
SA_521	M
SA_522	M
SA_523	M
SA_524	H
SA_525	H
SA_526	H
SA_527	H
SA_528	H
SA_529	H
SA_530	H
SA_531	H
SA_532	H
SA_533	M
SA_534	M
SA_535	H
SA_536	H
SA_537	H
SA_538	H
SA_539	H
SA_540	H
SA_541	H
SA_542	H
SA_543	H
SA_544	H
SA_545	H
SA_546	M
SA_547	M
SA_548	M
SA_549	M
SA_550	M
SA_551	M
SA_552	M
SA_553	M
SA_554	M
SA_555	M
SA_556	M
SA_557	M
SA_558	M
SA_559	M
SA_560	M
SA_561	M
SA_562	M
SA_563	M
SA_564	M
SA_565	M
SA_566	M
SA_567	M
SA_568	M
SA_569	M
SA_570	M
SA_571	M
SA_572	M
SA_573	M
SA_574	M
SA_575	M
SA_576	H
SA_577	H
SA_578	H
SA_579	H
SA_580	M
SA_581	H
SA_582	M
SA_583	M
SA_584	M
SA_585	M
SA_586	H
SA_587	H
SA_588	H
SA_589	H
SA_590	H
SA_591	M
SA_592	M
SA_593	H
SA_594	H
SA_595	H
SA_596	H
SA_597	H
SA_598	H
SA_599	H
SA_600	M
SA_601	M
SA_602	H
SA_603	H
SA_604	H
SA_605	M
SA_606	M
SA_607	H
SA_608	H
SA_609	H
SA_610	H
SA_611	H
SA_612	H
SA_613	M
SA_614	H
SA_615	H
SA_616	M
SA_617	M
SA_618	H
SA_619	M
SA_620	M
SA_621	H
SA_622	H
SA_623	M
SA_624	M
SA_625	M
SA_626	M
SA_627	M
SA_628	H
SA_629	H
SA_630	H
SA_631	H
SA_632	M
SA_633	M
SA_634	M
SA_635	M
SA_636	H
SA_637	H
SA_638	H
SA_639	H
SA_640	H
SA_641	H
SA_642	H
SA_643	H
SA_644	H
SA_645	H
SA_646	H
SA_647	H
SA_648	H
SA_649	M
SA_650	M
SA_651	M
SA_652	M
SA_653	M
SA_654	H
SA_655	H
SA_656	H
SA_657	M
SA_658	M
SA_659	M
SA_660	H
SA_661	H
SA_662	H
SA_663	H
SA_664	H
SA_665	H
SA_666	H
SA_667	H
SA_668	H
SA_669	H
SA_670	H
SA_671	H
SA_672	H
SA_673	H
SA_674	H
SA_675	H
SA_676	H
SA_677	H
SA_678	H
SA_679	H
SA_680	H
SA_681	H
SA_682	H
SA_683	M
SA_684	M
SA_685	M
SA_686	H
SA_687	H
SA_688	H
SA_689	H
SA_690	H
SA_691	H
SA_692	H
SA_693	M
SA_694	M
SA_695	H
SA_696	H
SA_697	H
SA_698	H
SA_699	H
SA_700	H
SA_701	M
SA_702	H
SA_703	H
SA_704	H
SA_705	H
SA_706	H
SA_707	M
SA_708	H
SA_709	M
SA_710	M
SA_711	M
SA_712	M
SA_713	H
SA_714	H
SA_715	H
SA_716	H
SA_717	H
SA_718	H
SA_719	H
SA_720	M
SA_721	H
SA_722	H
SA_723	H
SA_724	H
SA_725	H
SA_726	H
SA_727	H
SA_728	H
SA_729	H
SA_730	H
SA_731	H
SA_732	H
SA_733	H
SA_734	H
SA_735	H
SA_736	H
SA_737	M
SA_738	H
SA_739	H
SA_740	H
SA_741	H
SA_742	H
SA_743	H
SA_744	H
SA_745	H
SA_746	H
SA_747	H
SA_748	M
SA_749	H
SA_750	H
SA_751	H
SA_752	M
SA_753	M
SA_754	M
SA_755	M
SA_756	H
SA_757	H
SA_758	H
SA_759	M
SA_760	M
SA_761	M
SA_762	M
SA_763	M
SA_764	M
SA_765	H
SA_766	H
SA_767	H
SA_768	H
SA_769	M
SA_770	M
SA_771	M
SA_772	M
SA_773	H
SA_774	H
SA_775	H
SA_776	H
SA_777	M
SA_778	H
SA_779	H
SA_780	H
SA_781	H
SA_782	H
SA_783	H
SA_784	H
SA_785	H
SA_786	H
SA_787	H
SA_788	M
SA_789	M
SA_790	M
SA_791	M
SA_792	H
SA_793	M
SA_794	M
SA_795	M
SA_796	M
SA_797	M
SA_798	H
SA_799	M
SA_800	H
SA_801	M
SA_802	H
SA_803	M
SA_804	M
SA_805	M
SA_806	M
SA_807	M
SA_808	M
SA_809	M
SA_810	H
SA_811	M
SA_812	M
SA_813	M
SA_814	M
SA_815	H
SA_816	M
SA_817	M
SA_818	M
SA_819	M
SA_820	H
SA_821	M
SA_822	H
SA_823	H
SA_824	H
SA_825	H
SA_826	H
SA_827	H
SA_828	H
SA_829	H
SA_830	M
SA_831	H
SA_832	H
SA_833	H
SA_834	H
SA_835	M
SA_836	M
SA_837	M
SA_838	M
SA_839	M
SA_840	M
SA_841	M
SA_842	H
SA_843	H
SA_844	H
SA_845	H
SA_846	H
SA_847	H
SA_848	H
SA_849	H
SA_850	H
SA_851	M
SA_852	M
SA_853	M
SA_854	M
SA_855	H
SA_856	H
SA_857	H
SA_858	H
SA_859	H
SA_860	H
SA_861	H
SA_862	H
SA_863	M
SA_864	H
SA_865	H
SA_866	H
SA_867	M
SA_868	H
SA_869	H
SA_870	H
SA_871	H

## Sheet: sub_parameters_CHER
CHER: network sub-parameters
Node ID	Author	Gender	Degree	Betweenness	Closeness	Eigen Centrality	Average Shortest Paths	Intra module conectivity	participation index	Transitivity (con NAs)
1	CA_178	M	40	4442.04	0.000974659	0.239245	2.72872	1.54355	0.417355	0.367865
2	CA_286	M	29	3001.81	0.00092081	0.119653	2.8883	2.24524	0.377143	0.25042
3	CA_532	W	2	0	0.000579374	0.00140868	4.59043	-0.917249	0.5	1
4	CA_343	W	8	7.9	0.000581395	0.0115289	4.57447	1.65105	0.493827	0.0718954
5	CA_147	M	43	4537.21	0.000983284	0.538569	2.70479	2.48686	0.616111	0.149153
6	CA_384	W	41	586.569	0.00095057	1	2.79787	1.61632	0.308673	0.387013
7	CA_020	M	1	0	0.00058072	0.000521443	4.57979	-0.582575	0	NA
8	CA_032	M	10	1034.5	0.00074184	0.020453	3.58511	-0.0926133	0.35503	0.179487
9	CA_401	M	38	3842.88	0.000993049	0.25256	2.67819	1.24607	0.409972	0.514936
10	CA_082	M	1	0	0.000724113	0.00643895	3.67287	-0.761955	0	NA
11	CA_021	M	38	7765.87	0.000974659	0.291852	2.72872	2.72848	0.491462	0.187075
12	CA_576	W	24	458.067	0.000934579	0.228311	2.84574	-0.456713	0.464444	0.409195
13	CA_151	M	41	2176.76	0.00094697	0.790498	2.80851	1.5603	0.0425331	0.555556
14	CA_237	M	4	0	0.000770416	0.116325	3.45213	-0.56877	1.11e-16	0.285714
15	CA_330	W	5	10.9792	0.000745156	0.137268	3.56915	-0.56877	0.21875	0.214286
16	CA_417	M	54	6940.53	0.00100604	0.919812	2.64362	2.51277	0.140789	0.285391
17	CA_334	W	33	2583.33	0.000938086	0.231396	2.83511	1.91541	0.0973044	0.453441
18	CA_473	M	1	0	0.000694444	0.0176982	3.82979	-0.613212	0	0
19	CA_181	M	6	262.484	0.000840336	0.0281281	3.16489	-0.687583	0.722222	0.466667
20	CA_430	W	11	1376.37	0.000863558	0.0743962	3.07979	-0.390098	0.625	0.212121
21	CA_127	W	2	0	0.000579374	0.00114392	4.59043	1.60208	0.5	1
22	CA_502	M	13	4037.9	0.000739098	0.043725	3.5984	-0.46447	0.4352	0.0433333
23	CA_453	W	31	1563.56	0.00093633	0.227586	2.84043	1.32044	0.120708	0.709677
24	CA_484	M	3	0	0.000694444	0.00611399	3.82979	-0.613212	0	1
25	CA_167	M	10	651.47	0.000785546	0.105621	3.38564	-0.344657	0.336735	0.153846
26	CA_386	W	1	0	0.000690608	0.00221738	3.85106	-0.895815	0	NA
27	CA_247	M	28	4993.07	0.000931099	0.0869738	2.85638	2.24524	0.386939	0.245378
28	CA_485	M	10	3023.39	0.000658328	0.00263862	4.03989	2.44683	1.11e-16	0.21978
29	CA_197	M	7	1166.92	0.00069735	0.00354746	3.81383	0.815609	0.197531	0.305556
30	CA_436	W	2	0	0.000694444	0.0181406	3.82979	-0.84891	0	1
31	CA_335	M	3	52.1037	0.000746269	0.0378635	3.56383	-0.792882	0.375	0.166667
32	CA_177	M	30	526.49	0.000980392	0.256034	2.71277	1.02296	0.335068	0.722581
33	CA_189	M	11	2270.42	0.000833333	0.0392319	3.19149	0	0.612245	0.0769231
34	CA_169	M	12	7804.46	0.000816993	0.0989099	3.25532	-0.512741	0.622449	0.120879
35	CA_543	M	38	1890.15	0.000960615	0.694472	2.76862	1.1681	0.0499671	0.767881
36	CA_434	W	7	45.4296	0.000740192	0.0199037	3.59309	-0.315727	0.345679	0.222222
37	CA_106	M	47	10010.9	0.00101215	0.249464	2.62766	3.17972	0.257999	0.182284
38	CA_115	M	4	194.569	0.000600962	0.000454646	4.42553	1.09545	0.277778	0.266667
39	CA_054	M	5	1192.01	0.000734754	0.0161592	3.61968	-0.687583	0.48	0.4
40	CA_257	W	1	0	0.000635324	0.00100021	4.18617	-0.816992	0	NA
41	CA_366	M	2	0	0.000507099	4.35e-05	5.24468	-0.775006	0	1
42	CA_283	M	2	0	0.000507099	4.35e-05	5.24468	-0.775006	0	1
43	CA_292	M	8	3548.73	0.000690131	0.00525544	3.85372	0	0.58	0.0222222
44	CA_131	W	44	3848.39	0.000990099	0.741132	2.68617	1.78441	0.0392	0.476735
45	CA_427	M	3	374	0.000686342	0.00477626	3.875	-0.654196	0	0.333333
46	CA_506	M	1	0	0.00054615	0.000121769	4.86968	-0.895815	0	NA
47	CA_408	W	9	4911.71	0.000825083	0.0305388	3.2234	0.815609	0.429752	0.236364
48	CA_326	W	5	0	0.000654022	0.000991088	4.06649	0	0	1
49	CA_397	W	5	0	0.000704225	0.0624305	3.7766	-0.680826	0	1
50	CA_488	M	38	401.889	0.000917431	0.773215	2.89894	1.44824	0	0.634551
51	CA_350	W	37	692.762	0.000943396	0.788524	2.81915	1.33618	0.0464853	0.660859
52	CA_194	W	2	0	0.000555247	0.000119972	4.78989	-0.815609	0	1
53	CA_254	M	7	2.075	0.000718391	0.0643285	3.70213	-0.018242	0	0.254545
54	CA_437	W	2	0	0.00071582	0.010824	3.71543	-0.687583	0	1
55	CA_159	M	3	0	0.000763942	0.00963634	3.48138	-0.775006	0.444444	1
56	CA_575	W	61	4781.95	0.00107066	0.92768	2.48404	1.39221	0.46781	0.412031
57	CA_074	W	41	534.765	0.00095511	0.946278	2.78457	1.44824	0.323247	0.432511
58	CA_519	M	38	256.234	0.000938086	0.893681	2.83511	1.61632	0.0807292	0.508865
59	CA_136	W	18	180.499	0.000818331	0.0675683	3.25	1.27876	0.172336	0.652381
60	CA_539	M	21	393.052	0.000849618	0.129718	3.13032	1.15795	0.392361	0.51087
61	CA_107	M	29	809.225	0.000958773	0.272258	2.77394	1.61793	0.107755	0.556303
62	CA_355	M	36	4129.57	0.000976562	0.360228	2.7234	3.10535	0.0700826	0.230303
63	CA_264	M	5	837.5	0.000739645	0.00760647	3.59574	-0.538841	0.444444	0.266667
64	CA_456	M	2	374	0.000580046	0.000194051	4.58511	1.60208	0.5	0
65	CA_152	M	41	616.086	0.000962464	0.906373	2.7633	1.72838	0.112265	0.476863
66	CA_460	M	6	1.33333	0.000696864	0.0194087	3.81649	-0.166985	0	0.305556
67	CA_544	M	3	0	0.000791766	0.0343171	3.35904	-0.46447	0.408163	0.142857
68	CA_352	W	3	374	0.000740192	0.0110878	3.59309	-0.613212	0	0.333333
69	CA_090	W	4	0	0.000732601	0.0137009	3.63032	-0.46447	0	0.6
70	CA_099	W	5	0	0.00071736	0.0415667	3.70745	-0.315727	1.11e-16	0.47619
71	CA_319	M	48	2724.34	0.000968054	0.869536	2.74734	1.89646	0.137521	0.423569
72	CA_364	M	36	3130.26	0.0010352	0.416309	2.56915	0.948584	0.498615	0.549075
73	CA_101	M	12	961.662	0.000466418	2.79e-05	5.70213	2.07414	0	0.109524
74	CA_202	M	10	636.639	0.000465983	1.87e-05	5.70745	1.41698	0	0.132353
75	CA_450	W	10	733.899	0.000520562	0.00016121	5.10904	1.41698	0	0.176471
76	CA_554	W	4	0	0.000443066	1.11e-05	6.00266	-0.71876	0	1
77	CA_061	M	2	0	0.000512821	2.06e-05	5.18617	-0.582575	0	1
78	CA_205	M	3	144.549	0.000621118	0.000324792	4.28191	-0.654196	0.375	0.333333
79	CA_581	W	8	4706	0.000681663	0.004508	3.9016	-0.533386	0.48	0.355556
80	CA_120	W	8	164	0.000547345	0.000144766	4.85904	1.0034	0.165289	0.418182
81	CA_173	M	3	11.272	0.000693963	0.0182822	3.83245	-0.84891	0.444444	0.333333
82	CA_220	W	10	434.061	0.000765697	0.0263562	3.4734	0.9759	0.628099	0.236364
83	CA_217	W	2	0	0.000708717	0.0109288	3.75266	-0.687583	0	1
84	CA_300	M	45	8180.54	0.000963391	0.407062	2.76064	4.22092	0.104938	0.139671
85	CA_219	W	5	167.589	0.000792393	0.0141538	3.35638	-0.412577	0.53125	0.142857
86	CA_111	W	35	198.352	0.000935454	0.674319	2.84309	0.943988	0.0555102	0.944538
87	CA_184	M	1	0	0.000635324	0.00100021	4.18617	-0.816992	0	NA
88	CA_110	W	5	146.881	0.000711744	0.01135	3.7367	-0.538841	0.32	0.6
89	CA_433	W	2	5.52255	0.000621891	0.00440786	4.2766	-0.582575	0.5	0
90	CA_410	M	2	0	0.000724113	0.0215877	3.67287	-0.84891	0	1
91	CA_375	M	37	2193.3	0.000952381	0.702126	2.79255	1.28016	0	0.728205
92	CA_513	M	5	0	0.000738007	0.00745137	3.60372	-0.46447	0	1
93	CA_304	M	5	0	0.000738007	0.00745137	3.60372	-0.46447	0	1
94	CA_158	W	4	0	0.000397614	1.28e-06	6.68883	-0.71876	0	1
95	CA_584	W	4	0	0.000397614	1.28e-06	6.68883	-0.71876	0	1
96	CA_409	M	6	7.74286	0.00073692	0.0534407	3.60904	-0.624798	0.244898	0.428571
97	CA_439	W	5	47.1572	0.000769231	0.010904	3.45745	-0.654196	0.5	0.4
98	CA_226	M	3	0	0.000693481	0.00626037	3.83511	-0.613212	0	1
99	CA_295	M	3	0	0.000693481	0.00626037	3.83511	-0.613212	0	1
100	CA_252	M	4	1118	0.000529942	6.74e-05	5.01862	-0.27187	0	0.166667
101	CA_385	W	2	0	0.000695894	0.00515645	3.82181	-0.533386	0	0.166667
102	CA_557	W	5	2.7	0.00073692	0.0285912	3.60904	0.0561292	0	0.106061
103	CA_414	M	4	0	0.000735835	0.0157879	3.61436	-0.241356	0	0.214286
104	CA_403	M	4	222.779	0.000736377	0.0144365	3.6117	-0.46447	0.277778	0.2
105	CA_517	M	6	0.5	0.000710732	0.109131	3.74202	0.502357	0	0.0849673
106	CA_039	W	6	0.5	0.000710732	0.109131	3.74202	0.502357	0	0.0849673
107	CA_512	M	4	0	0.000573066	0.000212307	4.64096	-0.182574	0.375	1
108	CA_372	M	12	4039	0.000727273	0.00769001	3.65691	-0.775006	0.680556	0.257576
109	CA_191	M	4	6.92354	0.000728332	0.0521882	3.6516	-0.241356	0	0.107143
110	CA_369	M	2	0	0.000397298	2.38e-06	6.69415	-0.71876	0	0.166667
111	CA_309	M	1	0	0.000734214	0.00636001	3.62234	-0.761955	0	NA
112	CA_498	M	4	550.602	0.000586166	0.000168765	4.53723	0.486864	0.32	0.1
113	CA_149	M	1	0	0.000472144	1.09e-05	5.63298	-1.09545	0	0
114	CA_342	W	5	374	0.000573394	0.000212846	4.6383	1.64317	0.277778	0.4
115	CA_244	M	7	748.333	0.000457038	7.81e-06	5.81915	0.152692	1.11e-16	0.333333
116	CA_345	W	10	1085	0.000548546	0.00014505	4.8484	1.57055	0.142012	0.333333
117	CA_048	M	4	97.2845	0.000600962	0.000450552	4.42553	0.486864	0.32	0.4
118	CA_486	M	1	0	0.000630517	0.000778578	4.21809	-1.08748	0	NA
119	CA_086	W	38	1431.61	0.000917431	0.673113	2.89894	1.1681	0	0.800853
120	CA_558	W	2	0	0.000635728	0.00102638	4.18351	-0.653594	0	1
121	CA_183	W	1	0	0.000579039	0.00111476	4.59309	-0.761955	0	NA
122	CA_468	M	2	0	0.000665779	0.0042374	3.99468	-1.21988	0.5	1
123	CA_266	M	5	5.32107	0.000673854	0.00905019	3.94681	0.9759	0.444444	0.466667
124	CA_444	M	1	0	0.00057971	0.000282682	4.58777	-0.761955	0	NA
125	CA_200	M	5	0	0.000573066	0.000218319	4.64096	0	0.32	1
126	CA_146	M	5	0	0.000573066	0.000218319	4.64096	0	0.32	1
127	CA_382	W	1	0	0.000571755	0.000196055	4.6516	-0.582575	0	NA
128	CA_108	W	5	1.2	0.000580383	0.00302051	4.58245	1.28415	0.345679	0.222222
129	CA_188	M	3	0	0.00057971	0.00163971	4.58777	0.18345	0.32	0.3
130	CA_545	M	36	545.283	0.000915751	0.673678	2.90426	1.11207	0	0.843844
131	CA_233	M	8	164	0.000547345	0.000144766	4.85904	1.0034	0.165289	0.418182
132	CA_416	W	8	164	0.000547345	0.000144766	4.85904	1.0034	0.165289	0.418182
133	CA_406	W	41	616.086	0.000962464	0.906373	2.7633	1.72838	0.112265	0.476863
134	CA_083	M	5	1118	0.000625391	0.00166329	4.25266	-0.412577	0	0.2
135	CA_067	W	1	0	0.000506842	4.24e-05	5.24734	-0.895815	0	NA
136	CA_087	W	6	1.33333	0.000696864	0.0194087	3.81649	-0.166985	0	0.305556
137	CA_344	W	3	0	0.000740192	0.0393867	3.59309	-0.736854	0	0.5
138	CA_458	M	1	0	0.00058072	0.000521443	4.57979	-0.582575	0	NA
139	CA_346	W	38	755.751	0.000926784	0.692205	2.86968	1.05604	0.144642	0.766532
140	CA_525	W	34	0	0.000914077	0.688554	2.90957	1.00002	0	0.942857
141	CA_494	W	1	0	0.000667111	0.00207799	3.9867	-0.895815	0	NA
142	CA_377	W	24	6704.9	0.000888889	0.0815068	2.99202	1.52038	0.359396	0.39886
143	CA_482	M	4	103.558	0.000796813	0.0272572	3.33777	-0.84891	0.5	0.333333
144	CA_362	M	1	0	0.000548546	0.000267972	4.8484	-0.653594	0	0
145	CA_503	M	32	3172.8	0.000972763	0.247459	2.73404	1.39481	0.216263	0.586453
146	CA_241	M	1	0	0.000713267	0.0063089	3.72872	-0.761955	0	NA
147	CA_081	M	2	0	0.000712758	0.0178393	3.73138	-0.84891	0	1
148	CA_070	M	36	429.045	0.000919963	0.672466	2.89096	1.05604	0	0.892063
149	CA_405	W	13	2887.05	0.000769231	0.00706459	3.45745	2.28758	0.169421	0.134199
150	CA_492	W	2	0	0.00069735	0.0176874	3.81383	-0.84891	0	1
151	CA_535	W	2	0	0.00069735	0.0176874	3.81383	-0.84891	0	1
152	CA_066	W	2	0	0.000548847	0.000137491	4.84574	-0.653594	0	1
153	CA_505	M	9	986.883	0.000548246	0.000133879	4.85106	0.436263	0.197531	0.638889
154	CA_240	M	2	0	0.000390472	2.04e-07	6.81117	-1.26516	0	1
155	CA_570	M	10	1112	0.000811688	0.0325655	3.2766	0.191472	0.165289	0.527273
156	CA_363	M	1	0	0.000622665	0.00083025	4.27128	-0.895815	0	NA
157	CA_154	W	2	0	0.000684932	0.0211236	3.88298	-0.84891	0	1
158	CA_059	M	2	0	0.000684932	0.0211236	3.88298	-0.84891	0	1
159	CA_288	M	32	598.927	0.000965251	0.463802	2.75532	1.32044	0.472789	0.41115
160	CA_057	M	4	230.641	0.000717875	0.161543	3.70479	-0.56877	0.21875	0.107143
161	CA_592	M	9	738	0.00081103	0.0325454	3.27926	0.0706623	0.18	0.644444
162	CA_586	W	14	1571.98	0.000837521	0.0289987	3.17553	0.490195	0.601562	0.291667
163	CA_046	M	41	2124.04	0.000952381	0.777471	2.79255	1.50427	0.084121	0.557488
164	CA_426	M	3	0	0.000770416	0.0237961	3.45213	-0.904938	0.666667	1
165	CA_045	W	1	0	0.000442282	1.72e-06	6.0133	-1.08748	0	NA
166	CA_524	W	15	1477.93	0.00088574	0.157157	3.00266	-0.56877	0.648438	0.433333
167	CA_424	M	4	0	0.000673401	0.00503779	3.94947	0.243975	0.375	1
168	CA_211	M	10	733.899	0.000520562	0.00016121	5.10904	1.41698	0	0.176471
169	CA_221	W	4	0	0.00071582	0.00678279	3.71543	-0.538841	0	1
170	CA_012	W	4	0	0.00071582	0.00678279	3.71543	-0.538841	0	1
171	CA_195	M	7	213.08	0.000801282	0.100327	3.31915	-0.624798	0.444444	0.277778
172	CA_224	M	1	0	0.000476644	4.95e-06	5.57979	1.60208	0	NA
173	CA_442	M	5	0	0.000725689	0.0233756	3.66489	-0.680826	0	1
174	CA_455	W	5	0	0.000725689	0.0233756	3.66489	-0.680826	0	1
175	CA_379	W	4	0	0.000695894	0.00706926	3.82181	-0.538841	0	1
176	CA_380	W	30	306.35	0.00095511	0.263199	2.78457	1.54355	0.110727	0.600713
177	CA_552	W	8	0	0.000689655	0.0031988	3.85638	1.47059	0.117188	0.233333
178	CA_594	W	5	0	0.000733138	0.0261134	3.62766	-0.680826	0	1
179	CA_582	M	41	3211.49	0.000967118	0.873335	2.75	1.1681	0.369846	0.506803
180	CA_315	M	6	1238.81	0.000796178	0.0117544	3.34043	-0.412577	0.408163	0.238095
181	CA_179	M	38	838.987	0.000919963	0.807424	2.89096	1.44824	0.0444215	0.603594
182	CA_476	M	7	746	0.000530786	0.000104959	5.01064	0.543739	1.11e-16	0.52381
183	CA_230	W	3	0	0.00070922	0.0112147	3.75	-0.613212	0	1
184	CA_265	M	10	746	0.000690608	0.00320277	3.85106	1.79738	0.104938	0.189542
185	CA_449	W	2	0	0.00058072	0.000611149	4.57979	-0.582575	0	1
186	CA_294	M	4	0	0.000778816	0.12499	3.41489	-0.680826	0.277778	0.4
187	CA_210	M	4	0	0.000710732	0.0112404	3.74202	-0.538841	0	1
188	CA_269	M	2	0	0.000443066	2.75e-06	6.00266	-0.815609	0	1
189	CA_531	M	2	0	0.000443066	2.75e-06	6.00266	-0.815609	0	1
190	CA_267	M	7	0	0.000724638	0.0262331	3.67021	-0.56877	1.11e-16	1
191	CA_141	M	4	0	0.000734214	0.0246632	3.62234	-0.533386	0	1
192	CA_109	W	4	0	0.000700771	0.0218226	3.79521	-0.736854	0	1
193	CA_388	W	2	0	0.000731529	0.0240639	3.63564	-0.84891	0	1
194	CA_451	W	2	0	0.000731529	0.0240639	3.63564	-0.84891	0	1
195	CA_418	W	4	0	0.00071582	0.00678279	3.71543	-0.538841	0	1
196	CA_068	W	7	4.5	0.00071736	0.0132365	3.70745	-0.241356	0	0.428571
197	CA_446	M	29	1116	0.000934579	0.227382	2.84574	1.24607	0.124444	0.754023
198	CA_562	W	3	0	0.000693481	0.0119133	3.83511	-0.538841	0	0.5
199	CA_019	W	2	0	0.000549149	8.38e-05	4.84309	-0.653594	0	1
200	CA_076	W	4	0	0.00070373	0.0778853	3.77926	-0.736854	0	1
201	CA_470	W	38	401.889	0.000917431	0.773215	2.89894	1.44824	0	0.634551
202	CA_413	M	4	0	0.000695894	0.00706926	3.82181	-0.538841	0	1
203	CA_139	W	2	0	0.000442478	1.76e-06	6.01064	-0.815609	0	1
204	CA_390	W	32	3382.87	0.00095511	0.278894	2.78457	1.39481	0.251429	0.564706
205	CA_563	W	5	0	0.000710227	0.0248653	3.74468	-0.46447	0	1
206	CA_396	W	5	151.22	0.000742942	0.0216365	3.57979	-0.904938	0.611111	0.466667
207	CA_440	M	2	0	0.000595593	0.00122356	4.46543	-1.21988	0.5	1
208	CA_515	M	4	0	0.000709723	0.0242314	3.74734	-0.538841	0	1
209	CA_231	W	31	729.238	0.00093633	0.325123	2.84043	2.43601	0.0831758	0.32657
210	CA_030	W	3	20.0688	0.000716846	0.00258806	3.71011	-0.816992	0.666667	0.333333
211	CA_441	M	39	3146.35	0.000942507	0.676081	2.82181	1.1681	0.0499671	0.761134
212	CA_551	W	2	0	0.000699301	0.0176896	3.80319	-0.84891	0	1
213	CA_499	M	1	0	0.000625782	0.00252168	4.25	-0.904938	0	NA
214	CA_150	M	3	0	0.000725163	0.0402666	3.66755	-0.46447	0	0.3
215	CA_069	W	35	1309.74	0.000971817	0.500357	2.7367	1.61793	0.426276	0.353623
216	CA_143	W	4	364.957	0.000768049	0.0098483	3.46277	-0.46447	0.44898	0.142857
217	CA_055	M	5	738.957	0.00076864	0.00985412	3.46011	-0.46447	0.53125	0.107143
218	CA_051	M	4	374	0.000798085	0.030233	3.33245	-0.761955	0.72	0.3
219	CA_100	W	1	0	0.000614628	0.00154156	4.32713	-0.582575	0	0
220	CA_047	M	3	74.5826	0.00069979	0.00581572	3.80053	-0.775006	0.444444	0.333333
221	CA_381	W	4	0	0.000556483	0.000944755	4.77926	0	0.48	0.6
222	CA_258	M	6	1484	0.000701262	0.0177741	3.79255	-0.84891	0.408163	0.333333
223	CA_290	M	4	374	0.000725689	0.020907	3.66489	-0.538841	0	0.5
224	CA_422	W	4	689.788	0.000678426	0.00648035	3.92021	-0.170957	1.11e-16	0.047619
225	CA_142	W	2	0	0.000683527	0.0176098	3.89096	-0.84891	0	1
226	CA_312	M	1	0	0.000715308	0.00918392	3.71809	-0.761955	0	NA
227	CA_305	M	2	0	0.000614628	0.00284104	4.32713	-0.895815	0.5	1
228	CA_487	M	7	3931.12	0.000636943	0.00254627	4.17553	-0.061608	0.197531	0.305556
229	CA_223	M	8	166.068	0.000758725	0.0282594	3.50532	-0.56877	0.21875	0.75
230	CA_336	M	1	0	0.000597015	0.000251228	4.45479	-0.582575	0	NA
231	CA_242	M	2	90.6918	0.000563063	0.000139044	4.7234	-0.653594	0	0
232	CA_243	M	3	384.006	0.000729395	0.00764181	3.64628	-0.775006	0.444444	0.333333
233	CA_318	M	2	89.0151	0.00060024	0.000198371	4.43085	-0.816992	0.5	0
234	CA_238	M	1	0	0.000570776	0.000533018	4.65957	-0.761955	0	NA
235	CA_518	M	1	0	0.000541126	0.000165215	4.91489	-0.895815	0	NA
236	CA_395	W	29	295.438	0.000934579	0.278363	2.84574	1.76667	0.102264	0.503003
237	CA_018	W	26	0	0.000931966	0.233398	2.85372	1.02296	0.137174	0.925926
238	CA_529	W	1	0	0.000597372	0.00018011	4.45213	-0.816992	0	NA
239	CA_550	W	4	57.1269	0.000750751	0.00747505	3.54255	-0.761955	0.625	0.5
240	CA_279	M	5	644.503	0.000634115	0.00048229	4.19415	-0.533386	0.444444	0.133333
241	CA_435	W	4	0	0.000556483	0.000502874	4.77926	0	0.375	1
242	CA_391	W	4	0	0.000556483	0.000502874	4.77926	0	0.375	1
243	CA_024	M	1	0	0.000480769	4.3e-06	5.53191	-1.33888	0	NA
244	CA_041	W	3	0	0.000725163	0.00678491	3.66755	-0.613212	0	1
245	CA_303	M	3	0	0.000725163	0.00678491	3.66755	-0.613212	0	1
246	CA_084	M	3	1109.72	0.000556483	0.000135176	4.77926	-1.04734	0.444444	0.333333
247	CA_510	M	5	8.34437	0.000838926	0.0721229	3.17021	-0.792882	0.56	0.6
248	CA_593	W	1	0	0.000512558	1.23e-05	5.18883	-0.582575	0	NA
249	CA_429	W	3	0	0.000720461	0.0195087	3.69149	-0.84891	0.444444	1
250	CA_389	W	7	181.656	0.000816327	0.0408146	3.25798	-0.538841	0.489796	0.428571
251	CA_555	W	4	0	0.000765111	0.00991434	3.47606	-0.654196	0.375	1
252	CA_225	W	24	458.067	0.000934579	0.221399	2.84574	-0.456713	0.473246	0.438424
253	CA_452	W	2	0	0.000579374	0.00114392	4.59043	1.60208	0.5	1
254	CA_204	M	3	0	0.000694444	0.00611399	3.82979	-0.613212	0	1
255	CA_042	W	4	0	0.000580046	0.00152456	4.58511	-0.18345	0.375	1
256	CA_419	W	2	0	0.000696864	0.00630968	3.81649	-0.687583	0	1
257	CA_256	W	3	0	0.00058651	0.000435054	4.53457	-0.730297	0.444444	1
258	CA_536	W	2	0	0.000579374	0.00140868	4.59043	-0.917249	0.5	1
259	CA_469	M	2	0	0.000724113	0.0215877	3.67287	-0.84891	0	1
260	CA_454	M	10	738.9	0.00065703	0.00115829	4.04787	1.90309	0	0.318182
261	CA_023	M	5	0.916667	0.000765697	0.0190764	3.4734	-0.412577	0.408163	0.380952
262	CA_132	W	35	60.6212	0.000931966	0.720313	2.85372	1.05604	0.0525931	0.845345
263	CA_297	M	4	0	0.000397614	2.44e-06	6.68883	-0.390184	0	0.4
264	CA_293	M	6	139.09	0.000519481	8.43e-05	5.11968	-0.061608	0	0.392857
265	CA_270	M	2	0	0.000581734	0.000715368	4.57181	-0.582575	0	1
266	CA_249	M	4	1	0.000709723	0.0216063	3.74734	-0.46447	0	0.4
267	CA_423	W	5	0	0.000738007	0.00745137	3.60372	-0.46447	0	1
268	CA_553	W	4	0	0.000732601	0.026146	3.63032	-0.736854	0	1
269	CA_038	W	4	0	0.000735835	0.0157879	3.61436	-0.241356	0	0.214286
270	CA_228	W	4	0	0.000573066	0.000212307	4.64096	-0.182574	0.375	1
271	CA_559	W	2	0	0.000708717	0.0117085	3.75266	-0.687583	0	1
272	CA_591	M	2	0	0.000455996	3.9e-06	5.83245	-1.26516	0	1
273	CA_394	W	2	0	0.000685871	0.0176269	3.87766	-0.84891	0	1
274	CA_587	W	2	0	0.000635728	0.00102638	4.18351	-0.653594	0	1
275	CA_370	M	5	0	0.000573066	0.000218319	4.64096	0	0.32	1
276	CA_222	W	3	0	0.000763942	0.00938937	3.48138	-0.775006	0.444444	1
277	CA_091	W	2	0	0.000579374	0.00140868	4.59043	-0.917249	0.5	1
278	CA_331	W	13	967.598	0.000764526	0.041735	3.47872	-0.680826	0.459184	0.395604
279	CA_504	M	2	0	0.000548847	0.000137491	4.84574	-0.653594	0	1
280	CA_398	M	8	6.78333	0.000457247	1.89e-05	5.81649	0.436263	0	0.642857
281	CA_573	W	2	0	0.000390472	2.04e-07	6.81117	-1.26516	0	1
282	CA_129	W	8	0	0.000808407	0.0316944	3.28989	-0.170957	0.21875	1
283	CA_255	M	4	0	0.00071582	0.00678279	3.71543	-0.538841	0	1
284	CA_339	M	3	0	0.000739645	0.00916091	3.59574	-0.687583	0.444444	1
285	CA_311	M	5	0	0.000725689	0.0233756	3.66489	-0.680826	0	1
286	CA_161	M	4	0	0.000695894	0.00706926	3.82181	-0.538841	0	1
287	CA_322	M	8	0	0.000689655	0.0031988	3.85638	1.47059	0.117188	0.233333
288	CA_462	M	5	0	0.000733138	0.0261134	3.62766	-0.680826	0	1
289	CA_527	W	34	1278.22	0.000968992	0.443571	2.74468	1.54355	0.380952	0.413473
290	CA_374	M	5	151.933	0.000740741	0.00953501	3.59043	-0.613212	0.56	0.5
291	CA_298	M	4	0	0.000710732	0.0112404	3.74202	-0.538841	0	1
292	CA_168	M	7	0	0.000724638	0.0262331	3.67021	-0.56877	1.11e-16	1
293	CA_556	W	22	269.379	0.000874891	0.112301	3.03989	1.52038	0.2816	0.49
294	CA_480	W	4	0	0.000700771	0.0218226	3.79521	-0.736854	0	1
295	CA_009	W	2	0	0.000549149	8.38e-05	4.84309	-0.653594	0	1
296	CA_190	M	4	0	0.000695894	0.00706926	3.82181	-0.538841	0	1
297	CA_056	M	2	0	0.000442478	1.76e-06	6.01064	-0.815609	0	1
298	CA_033	M	4	0	0.000517598	7.53e-05	5.1383	-0.71876	0	1
299	CA_521	M	5	0	0.000710227	0.0248653	3.74468	-0.46447	0	1
300	CA_029	M	2	0	0.000683527	0.0176098	3.89096	-0.84891	0	1
301	CA_128	W	2	0	0.000597372	0.000502308	4.45213	-0.582575	0	1
302	CA_232	W	2	0	0.000708717	0.0234169	3.75266	-0.538841	0	0.166667
303	CA_035	W	3	0	0.000725163	0.00678491	3.66755	-0.613212	0	1
304	CA_477	W	2	0	0.000693001	0.00251705	3.83777	-0.775006	0	1
305	CA_036	W	3	0	0.000694444	0.00611399	3.82979	-0.613212	0	1
306	CA_003	M	5	0	0.000738007	0.00745137	3.60372	-0.46447	0	1
307	CA_105	M	4	0	0.000732601	0.026146	3.63032	-0.736854	0	1
308	CA_461	M	4	0	0.000735835	0.0157879	3.61436	-0.241356	0	0.214286
309	CA_040	W	4	0	0.000573066	0.000212307	4.64096	-0.182574	0.375	1
310	CA_016	M	3	0	0.000763942	0.00938937	3.48138	-0.775006	0.444444	1
311	CA_378	W	3	0	0.000456204	4.09e-06	5.82979	-0.981591	0	1
312	CA_077	W	17	0	0.000816993	0.0582753	3.25532	0.79552	0.207612	1
313	CA_432	W	4	0	0.000673401	0.00503779	3.94947	0.243975	0.375	1
314	CA_383	W	4	0	0.000517598	7.53e-05	5.1383	-0.71876	0	1
315	CA_358	M	5	0	0.000733138	0.0261134	3.62766	-0.680826	0	1
316	CA_253	M	5	0	0.000530223	0.000104822	5.01596	0	0	1
317	CA_399	W	3	0	0.00070922	0.0112147	3.75	-0.613212	0	1
318	CA_393	W	8	0	0.000689655	0.0031988	3.85638	1.47059	0.117188	0.233333
319	CA_176	M	7	0	0.000724638	0.0262331	3.67021	-0.56877	1.11e-16	1
320	CA_301	M	4	0	0.000700771	0.0218226	3.79521	-0.736854	0	1
321	CA_075	W	4	0	0.00071582	0.00678279	3.71543	-0.538841	0	1
322	CA_092	W	35	80.338	0.000914913	0.731055	2.90691	1.1681	0	0.802276
323	CA_507	M	3	0	0.000738007	0.00707538	3.60372	-0.613212	0	1
324	CA_103	M	7	226.07	0.000519751	8.48e-05	5.11702	0.10268	0	0.416667
325	CA_005	M	4	0	0.000556483	0.000502874	4.77926	0	0.375	1
326	CA_078	M	4	0	0.000757002	0.0651893	3.5133	-0.792882	0.375	1
327	CA_171	W	4	0	0.000580046	0.00152456	4.58511	-0.18345	0.375	1
328	CA_215	W	5	0	0.000704225	0.0624305	3.7766	-0.680826	0	1
329	CA_590	W	4	0	0.000732601	0.013206	3.63032	-0.538841	0	1
330	CA_187	M	4	0	0.000732601	0.026146	3.63032	-0.736854	0	1
331	CA_421	W	5	0	0.000573066	0.000218319	4.64096	0	0.32	1
332	CA_392	W	5	0	0.000456204	1.53e-05	5.82979	-0.41445	0	1
333	CA_098	W	17	0	0.000816993	0.0582753	3.25532	0.79552	0.207612	1
334	CA_307	M	5	0	0.000725689	0.0233756	3.66489	-0.680826	0	1
335	CA_260	M	5	0	0.00071736	0.0256907	3.70745	-0.46447	0	1
336	CA_483	M	5	0	0.000733138	0.0261134	3.62766	-0.680826	0	1
337	CA_250	W	5	0	0.000530223	0.000104822	5.01596	0	0	1
338	CA_538	M	4	0	0.000710732	0.0112404	3.74202	-0.538841	0	1
339	CA_043	W	7	0	0.000724638	0.0262331	3.67021	-0.56877	1.11e-16	1
340	CA_317	M	4	0	0.000734214	0.0246632	3.62234	-0.533386	0	1
341	CA_172	M	4	0	0.000700771	0.0218226	3.79521	-0.736854	0	1
342	CA_182	W	4	0	0.000786782	0.0349458	3.38032	-0.775006	0.5	1
343	CA_277	M	4	0	0.00071582	0.00678279	3.71543	-0.538841	0	1
344	CA_010	W	8	0	0.000689655	0.00237019	3.85638	0.163398	0.21875	1
345	CA_013	W	5	0	0.000654022	0.000991088	4.06649	0	0	1
346	CA_011	M	5	0	0.000704225	0.0624305	3.7766	-0.680826	0	1
347	CA_411	M	5	0	0.000443262	1.16e-05	6	-0.554472	0	1
348	CA_540	M	5	0	0.000573066	0.000218319	4.64096	0	0.32	1
349	CA_218	W	17	0	0.000816993	0.0582753	3.25532	0.79552	0.207612	1
350	CA_314	M	5	0	0.000733138	0.0261134	3.62766	-0.680826	0	1
351	CA_324	W	5	0	0.000530223	0.000104822	5.01596	0	0	1
352	CA_117	W	7	0	0.000724638	0.0262331	3.67021	-0.56877	1.11e-16	1
353	CA_580	W	6	0	0.000546747	0.000133114	4.86436	-0.41445	0.277778	1
354	CA_239	M	40	354.502	0.000960615	0.806978	2.76862	1.33618	0.129132	0.640592
355	CA_583	W	8	0	0.000808407	0.0316944	3.28989	-0.170957	0.21875	1
356	CA_438	W	7	0	0.000724638	0.0262331	3.67021	-0.56877	1.11e-16	1
357	CA_064	W	17	0	0.000816993	0.0582753	3.25532	0.79552	0.207612	1
358	CA_332	W	8	0	0.000808407	0.0316944	3.28989	-0.170957	0.21875	1
359	CA_595	W	8	0	0.000689655	0.00237019	3.85638	0.163398	0.21875	1
360	CA_533	W	59	4149.46	0.00106838	0.876044	2.48936	1.00002	0.486111	0.511299
361	CA_287	W	26	0	0.000931966	0.226478	2.85372	0.948584	0.142012	1
362	CA_162	M	8	0	0.000808407	0.0316944	3.28989	-0.170957	0.21875	1
363	CA_216	W	26	0	0.000931966	0.226478	2.85372	0.948584	0.142012	1
364	CA_574	W	17	0	0.000816993	0.0582753	3.25532	0.79552	0.207612	1
365	CA_282	M	34	0	0.000914077	0.671345	2.90957	0.943988	0	1
366	CA_560	W	17	0	0.000816993	0.0582753	3.25532	0.79552	0.207612	1
367	CA_478	W	34	0	0.000914077	0.671345	2.90957	0.943988	0	1
368	CA_479	W	17	0	0.000816993	0.0582753	3.25532	0.79552	0.207612	1
369	CA_170	W	17	0	0.000816993	0.0582753	3.25532	0.79552	0.207612	1
370	CA_022	M	26	0	0.000931966	0.226478	2.85372	0.948584	0.142012	1
371	CA_349	W	34	0	0.000914077	0.671345	2.90957	0.943988	0	1
372	CA_049	M	26	0	0.000931966	0.226478	2.85372	0.948584	0.142012	1
373	CA_526	W	34	0	0.000914077	0.671345	2.90957	0.943988	0	1
374	CA_308	M	34	0	0.000914077	0.671345	2.90957	0.943988	0	1
375	CA_546	M	26	0	0.000931966	0.226478	2.85372	0.948584	0.142012	1
376	CA_333	W	34	0	0.000914077	0.671345	2.90957	0.943988	0	1

## Sheet: sub_parameters_SAJH
SAJH: network sub-parameters
Node ID	Author code	Gender	Degree	Betweenness	Closeness	Eigen Centrality	Average Shortest Paths	Intra module conectivity	Participation index	Transitivity (con NAs)
1	SA_432	M	28	13450.7	0.00054407	0.954537	3.81799	2.77354	0.0688776	0.378307
2	SA_589	M	20	1225.43	0.00050607	0.862791	4.11506	1.77051	0	0.684211
3	SA_170	M	18	12353.3	0.00050505	0.0150513	4.10042	1.98388	0.197531	0.48366
4	SA_065	M	17	7842.43	0.00048638	0.0186602	4.2636	-0.786793	0.415225	0.566176
5	SA_786	M	11	18.7292	0.00043066	0.0227306	4.81172	0.455512	0	1
6	SA_448	W	11	18.7292	0.00043066	0.0227306	4.81172	0.455512	0	1
7	SA_458	W	8	48.164	0.00048685	0.282511	4.24477	0.0510346	0	1
8	SA_817	W	7	0	0.00037908	0.00176622	5.4749	0.566221	1.11e-16	1
9	SA_857	M	7	0	0.00037908	0.00176622	5.4749	0.566221	1.11e-16	1
10	SA_810	M	27	22528.8	0.00051493	0.141456	4.02301	1.69765	0.699588	0.173789
11	SA_537	M	17	2892.13	0.00035261	0.0335414	5.84728	3.06672	0	0.338235
12	SA_676	M	13	9135.25	0.00052604	0.167709	3.92469	0.194324	0.461538	0.384615
13	SA_708	M	9	2419.25	0.00048972	0.0871915	4.23431	-0.235544	0.493827	0.611111
14	SA_669	M	10	927.938	0.00039825	0.0170005	5.02092	0.0246183	0.5	0.488889
15	SA_108	M	9	616.047	0.00048077	0.00925869	4.32427	0.252793	0.345679	0.611111
16	SA_370	W	6	40.5814	0.00039952	0.00252399	5.20084	0.29542	0	1
17	SA_692	M	13	1055.16	0.00041186	0.0040675	5.05021	2.19103	0	0.474359
18	SA_576	M	6	58375	0.00035907	0.00049497	5.77615	0.0604505	0	1
19	SA_751	M	9	1480375	0.00035702	0.00050035	5.76987	0.637478	0	0.5
20	SA_812	W	6	0.0625	0.00044014	0.0248675	4.70502	0.0633791	0.277778	1
21	SA_582	W	17	9209.91	0.00049826	0.109285	4.16946	2.28165	0.442907	0.301471
22	SA_006	W	10	13.444	0.00035162	0.0287993	5.87657	1.15002	0	0.666667
23	SA_098	W	7	950	0.0004344	0.0119228	4.74895	0.671361	0.244898	0.52381
24	SA_742	M	16	11978.1	0.00047687	0.0269838	4.25105	3.0327	0.414062	0.2
25	SA_287	M	6	23.0107	0.00039541	0.0252077	5.25105	-0.579742	0	0.8
26	SA_599	M	17	379.801	0.00039984	0.051706	5.20502	1.69782	0	0.5
27	SA_274	M	10	3758	0.0003459	0.00095057	6.0251	1.68655	0.32	0.377778
28	SA_710	W	5	58.75	0.00029744	7.65e-05	7.01046	-0.210819	0	1
29	SA_469	M	5	0.0625	0.00040717	0.0154097	5.12134	0.0633791	0	1
30	SA_743	M	5	0.0625	0.00040717	0.0154097	5.12134	0.0633791	0	1
31	SA_674	M	5	7.13929	0.00033167	0.00489712	6.27615	-0.219051	0	1
32	SA_768	M	9	1096.24	0.00033267	0.00705695	6.26987	0.876205	0	0.388889
33	SA_132	W	5	0	0.00041305	0.00251357	5.05439	-0.115752	0.32	1
34	SA_541	M	7	950	0.00041237	0.00253061	5.05021	0.671361	0.244898	0.52381
35	SA_746	M	13	3093.14	0.00040617	0.00285064	5.04812	1.85203	0.461538	0.269231
36	SA_498	W	5	5.8086	0.00036819	0.00107132	5.58368	0.277805	0	1
37	SA_417	M	8	952	0.00035461	0.103655	5.84519	0.0510346	0	0.428571
38	SA_600	W	5	235	0.00042535	0.0594847	4.8682	-0.378834	0	1
39	SA_200	M	5	102.122	0.00035373	0.00090659	5.80544	-0.131892	0	1
40	SA_645	M	14	1917.4	0.00034305	0.00466603	6.01883	1.40685	0.132653	0.186813
41	SA_340	M	5	0	0.0003785	0.0004935	5.48117	-0.131892	0	1
42	SA_041	W	5	0	0.0003785	0.0004935	5.48117	-0.131892	0	1
43	SA_689	M	20	7803.99	0.00046382	0.0159345	4.4749	3.14934	0.53	0.142105
44	SA_673	M	5	35.3409	0.00045147	0.072616	4.59833	-0.665413	0.48	1
45	SA_776	M	5	1.56364	0.00040584	0.0223984	5.10042	-0.665413	0.48	1
46	SA_646	M	5	1.56364	0.00040584	0.0223984	5.10042	-0.665413	0.48	1
47	SA_262	M	7	1036.63	0.00042882	0.00443689	4.82636	0.29542	0.244898	0.619048
48	SA_219	M	5	2.1548	0.00041528	0.00323134	4.98117	0.0246183	0	1
49	SA_777	W	14	4462.21	0.00041017	0.016643	5.08159	0.69717	0.622449	0.21978
50	SA_841	W	4	0	0.00034364	0.00116679	6.07113	0	375	1
51	SA_711	W	6	201.449	0.00037608	0.0100816	5.51883	0.0246183	0.277778	0.6
52	SA_771	W	8	2092.76	0.00046318	0.0665302	4.43933	-0.808703	375	0.357143
53	SA_211	M	4	0	0.00023392	1.49e-05	8.92259	0	0	1
54	SA_738	M	4	0	0.00023392	1.49e-05	8.92259	0	0	1
55	SA_610	M	4	37.7924	0.0003827	0.00192869	5.44979	0	0	1
56	SA_175	M	4	37.7924	0.0003827	0.00192869	5.44979	0	0	1
57	SA_253	M	4	27.6711	0.00043535	0.00602203	4.7636	-0.246183	0	1
58	SA_389	M	6	1813.11	0.00043937	0.00674323	4.7364	0.29542	0	0.466667
59	SA_544	M	4	79.5875	0.00043917	0.00563213	4.74477	-0.246183	0	1
60	SA_828	M	6	466.391	0.00039588	0.0110377	5.24895	0.29542	0	0.533333
61	SA_038	W	10	5627.5	0.0004279	0.0185506	4.82008	2.56148	0.18	0.288889
62	SA_390	M	4	273.4	0.00042481	0.0142989	4.84728	-0.178708	375	1
63	SA_842	M	6	5525.31	0.00052138	0.0976608	3.97699	-0.378834	0.277778	0.533333
64	SA_449	W	18	7784.92	0.00054855	0.700807	3.77824	1.34064	0.104938	0.72549
65	SA_834	M	10	6626.57	0.00049334	0.13084	4.17155	-0.665413	0.64	0.266667
66	SA_120	M	4	0	0.00043215	0.0669195	4.80753	-0.522124	0	1
67	SA_054	M	4	0	0.00043215	0.0669195	4.80753	-0.522124	0	1
68	SA_166	M	15	10089.7	0.00041339	0.0270122	5.04393	3.87298	0.391111	0.209524
69	SA_422	M	4	0	0.00034554	0.00189374	6.03347	0	0	1
70	SA_794	W	4	0.111111	0.0004384	0.00252326	4.69665	-0.324234	0	1
71	SA_321	W	4	0	0.00023315	8.55e-07	8.92259	0	0	1
72	SA_784	M	4	0	0.00023315	8.55e-07	8.92259	0	0	1
73	SA_840	W	8	6	0.00026089	0.00014026	7.98745	1.68655	0	0.571429
74	SA_799	W	4	58.75	0.000297	7.15e-05	7.01255	-0.843274	0	1
75	SA_694	W	4	0	0.00035524	0.00026699	5.79289	0	625	1
76	SA_759	W	4	0	0.00035524	0.00026699	5.79289	0	625	1
77	SA_850	M	4	0	0.00029481	0.00074813	7.07531	0.467707	0	1
78	SA_574	W	4	0	0.00029481	0.00074813	7.07531	0.467707	0	1
79	SA_672	M	7	3109.42	0.00046926	0.0557698	4.43515	-0.522124	0.489796	0.428571
80	SA_523	W	4	0	0.00043821	0.0454541	4.74895	-0.522124	0	1
81	SA_178	M	4	1572.02	0.00046083	0.0889399	4.48326	-0.522124	0	1
82	SA_437	W	4	4	0.00038835	0.143693	5.36611	-0.522124	0	1
83	SA_508	M	7	528.164	0.00037258	0.221621	5.15481	-0.0922549	1.11e-16	0.52381
84	SA_248	M	4	1433.45	0.00047148	0.0893595	4.39958	-0.522124	0	1
85	SA_811	W	4	0	0.00035298	0.00081011	5.84937	0.286212	0	1
86	SA_195	M	4	0	0.00035298	0.00081011	5.84937	0.286212	0	1
87	SA_021	W	4	0.0625	0.00040766	0.014343	5.11088	-0.253516	0	1
88	SA_709	W	4	0.0625	0.00040766	0.014343	5.11088	-0.253516	0	1
89	SA_440	M	4	0	0.00026724	0.00018986	7.7887	-0.492865	0	1
90	SA_649	W	4	0	0.00026724	0.00018986	7.7887	-0.492865	0	1
91	SA_593	M	6	3.33333	0.00033124	0.00047336	6.25523	0.277805	0.277778	0.733333
92	SA_330	M	4	637.001	0.00039324	0.00024972	5.27615	-0.509309	375	1
93	SA_626	W	4	637.001	0.00039262	0.00024956	5.28243	-0.509309	375	1
94	SA_654	M	11	4825.2	0.00042052	0.0027155	4.87657	1.85203	0.31405	0.381818
95	SA_497	W	6	1422	0.00034746	0.0220945	5.87657	0.0246183	0.277778	0.4
96	SA_096	M	5	1237.62	0.0004075	0.0155101	5.06485	-0.246183	0.32	0.5
97	SA_590	M	13	2535.52	0.00039093	0.0313199	5.32636	1.69765	0.142012	0.461538
98	SA_733	M	3	58375	0.0003592	0.00040334	5.7887	-0.516577	0	1
99	SA_713	M	20	5189.91	0.0004329	0.00570816	4.79916	2.5609	95	0.442105
100	SA_118	M	13	6090.5	0.00042337	0.0115528	4.86192	3.33914	0.142012	0.153846
101	SA_684	W	3	5.8086	0.00034048	0.00025244	6.03766	-0.509309	0	1
102	SA_303	W	3	5.8086	0.00034048	0.00025244	6.03766	-0.509309	0	1
103	SA_381	M	3	0	0.00035778	0.00038903	5.79707	-0.516577	0	1
104	SA_212	M	16	1970.21	0.00042955	0.00593815	4.80544	1.79153	0.117188	575
105	SA_214	M	11	1134.19	0.00041789	0.0135665	4.95188	1.37862	0.165289	0.363636
106	SA_043	W	3	31.3168	0.00035236	0.00159365	5.90377	-0.516984	0	1
107	SA_716	M	3	52.8809	0.00038285	0.00471053	5.31172	-0.787786	0.444444	1
108	SA_149	M	3	52.8809	0.00038285	0.00471053	5.31172	-0.787786	0.444444	1
109	SA_004	M	13	6492.63	0.00044484	0.0046351	4.65063	1.64943	0.272189	0.217949
110	SA_412	M	3	0	0.00032362	0.00343975	6.43305	-0.349927	0	1
111	SA_515	M	5	359.33	0.00041876	0.0128248	4.95607	-0.349927	0.56	0.4
112	SA_280	M	3	0	0.00039604	0.00114689	5.25314	-0.902865	0.444444	1
113	SA_074	M	3	0	0.00039604	0.00114689	5.25314	-0.902865	0.444444	1
114	SA_234	M	3	0	0.00028043	0.00164086	7.41841	-0.516984	0	1
115	SA_244	W	3	475.5	0.00032404	0.00088971	6.42259	-0.516984	0	1
116	SA_853	W	3	158.333	0.00029895	0.00021779	6.97699	-0.553283	0	1
117	SA_625	W	3	158.333	0.00029895	0.00021779	6.97699	-0.553283	0	1
118	SA_314	M	8	1892.5	0.00042845	0.0182777	4.83891	1.64809	0.21875	0.428571
119	SA_659	W	9	5162.27	0.00047664	0.00807344	4.37238	0.252793	0.345679	0.5
120	SA_196	W	3	43.5231	0.00041701	0.00127311	4.96862	-0.516577	0	1
121	SA_816	W	8	968.4	0.0003076	0.0351042	5.79079	1.64809	0.21875	0.357143
122	SA_310	W	3	273	0.00042463	0.0129136	4.88075	-0.635407	0.444444	1
123	SA_269	W	3	0	0.00029542	0.00144749	6.8682	-0.516984	0	1
124	SA_606	W	3	0	0.00029542	0.00144749	6.8682	-0.516984	0	1
125	SA_472	M	7	2059	0.00039432	0.00025244	5.26987	0.671361	0.244898	0.428571
126	SA_349	M	3	0	0.00033256	1.65e-05	6.26151	-0.509309	0	1
127	SA_712	W	3	0	0.00029516	3.61e-06	7.06485	-0.093026	0	1
128	SA_382	W	3	0	0.00029516	3.61e-06	7.06485	-0.093026	0	1
129	SA_670	M	3	0	0.00040568	0.00065496	5.13389	-0.447214	0.444444	1
130	SA_251	M	3	0	0.00040568	0.00065496	5.13389	-0.447214	0.444444	1
131	SA_309	W	3	0	0.00040469	0.001129	5.12762	0	0.444444	1
132	SA_404	M	6	404.273	0.0004095	0.00836929	5.05649	0	0.611111	0.4
133	SA_056	M	4	9.18182	0.00034435	0.00485205	6.0272	0	0	0.666667
134	SA_360	W	7	1501.59	0.00043879	0.0056934	4.73849	0.566221	1.11e-16	0.428571
135	SA_852	W	3	0	0.00036324	0.000373	5.73013	-0.516984	0	1
136	SA_516	W	3	0	0.00029516	3.61e-06	7.06485	-0.093026	0	1
137	SA_276	M	3	0	0.00029516	3.61e-06	7.06485	-0.093026	0	1
138	SA_057	M	3	0	0.00034282	0.00088476	5.95816	-0.349927	0	1
139	SA_756	M	3	0	0.00034282	0.00088476	5.95816	-0.349927	0	1
140	SA_601	W	3	0.2	0.00029691	6.5e-05	7.01464	-0.381881	0	1
141	SA_124	W	8	3300.2	0.00034495	0.00098223	6.0272	1.14564	0.46875	0.25
142	SA_116	M	11	10150.1	0.00041034	0.0147031	5.06485	1.33096	0.31405	0.2
143	SA_150	M	3	0	0.00039604	0.0187097	5.23013	-0.665413	0	1
144	SA_123	W	3	0	0.00039604	0.0187097	5.23013	-0.665413	0	1
145	SA_397	M	30	16175.7	0.00053248	0.744832	3.89121	2.91683	0.124444	0.303448
146	SA_218	M	9	235.345	0.00040617	0.217622	5.12343	-0.0922549	0.345679	0.444444
147	SA_163	M	3	0	0.00036969	0.00769853	5.62343	-0.901262	0.666667	1
148	SA_579	M	4	335.803	0.00039277	0.00802366	5.27824	-0.708919	625	0.5
149	SA_377	M	3	35.2784	0.00042427	0.0591771	4.88075	-0.665413	0	1
150	SA_534	W	3	0	0.00030731	3.28e-05	6.76151	-0.516577	0	1
151	SA_385	M	11	2459.26	0.00035162	0.00772839	5.85356	1.42383	0	0.290909
152	SA_862	M	3	0	0.00030349	0.00053974	6.84728	-0.766679	0	1
153	SA_258	M	5	474	0.00029709	6.97e-05	7.01255	1.14564	0	0.6
154	SA_405	M	5	474	0.00029709	6.97e-05	7.01255	1.14564	0	0.6
155	SA_813	W	3	0	0.00037481	0.00062861	5.56067	-0.516984	0	1
156	SA_587	M	3	0	0.00037481	0.00062861	5.56067	-0.516984	0	1
157	SA_354	W	3	1.25	0.00036166	0.00075138	5.75941	-0.349927	0	1
158	SA_055	M	4	235.5	0.00036179	0.00080225	5.76778	0	0	0.666667
159	SA_025	M	3	2.31429	0.00030618	0.0024987	6.80544	-0.766679	0	1
160	SA_529	M	19	5323.69	0.0004583	0.0175933	4.51464	3.54503	0.099723	0.22807
161	SA_272	M	3	46.1203	0.00037636	0.0013949	5.50209	-0.516984	0	1
162	SA_358	M	5	1422	0.00039872	0.00542297	5.21548	1.09545	0.32	0.4
163	SA_478	W	3	0	0.00033546	0.00035528	6.20711	0.182574	0	1
164	SA_793	W	3	0	0.00034014	5.7e-05	6.1046	0	0.444444	1
165	SA_598	M	3	0	0.00034014	5.7e-05	6.1046	0	0.444444	1
166	SA_180	M	3	1.5	0.00030331	0.00142577	6.83682	-0.0954041	0	0.666667
167	SA_186	M	2	0	0.00030349	0.0063733	6.83891	-0.808703	0	1
168	SA_109	M	10	1113.94	0.00041511	0.0499533	5.00628	0.837022	0.34	0.244444
169	SA_102	W	2	98.774	0.00041425	0.0104723	4.98745	-1.05859	0.5	1
170	SA_801	W	2	0	0.00025867	3.83e-05	8.06695	-1.40312	0	1
171	SA_032	W	2	0	0.00025867	3.83e-05	8.06695	-1.40312	0	1
172	SA_345	M	16	2086.32	0.0004279	0.00565085	4.80126	1.79153	0.117188	0.566667
173	SA_444	W	2	0	0.00030562	0.00074042	6.7887	-0.708919	0	1
174	SA_538	M	2	0	0.00026954	0.0021584	6.78452	-0.635407	0	1
175	SA_832	M	2	0	0.00026954	0.0021584	6.78452	-0.635407	0	1
176	SA_835	W	6	13.2024	0.00035224	0.0221569	5.89958	0.0547628	0	0.733333
177	SA_701	W	2	111.881	0.00041771	0.00947712	4.99372	-1.04049	0	1
178	SA_275	M	5	2029.17	0.0002994	0.00327298	6.96653	0.553283	0	0.2
179	SA_744	M	2	0	0.00034341	0.00102331	6.07531	-0.887308	0	1
180	SA_558	W	2	0	0.00034341	0.00102331	6.07531	-0.887308	0	1
181	SA_535	M	26	11493.9	0.00045126	0.00735979	4.5795	3.71496	0.0739645	0.24
182	SA_329	M	2	0	0.00037327	0.00045252	5.57322	-0.708919	0	1
183	SA_357	M	7	808.186	0.00039698	0.0121838	5.23013	0.566221	1.11e-16	0.285714
184	SA_153	W	5	438.083	0.00038197	0.00274153	5.33682	0.0246183	0	0.3
185	SA_847	M	2	0	0.00040032	0.00172813	5.20293	-0.902865	0	1
186	SA_254	M	19	2253.64	0.00042427	0.00717446	4.88075	2.36856	0.099723	0.473684
187	SA_642	M	3	0	0.00028043	0.00164086	7.41841	-0.516984	0	1
188	SA_539	M	3	476	0.0003686	0.00109388	5.63598	-0.516984	0	0.333333
189	SA_815	M	2	0	0.0002867	0.00047519	6.84728	-1.04049	0	1
190	SA_135	W	2	1.25	0.00030845	9.48e-05	6.74268	-0.699854	0	1
191	SA_363	M	2	237.5	0.00030893	5.71e-05	6.74268	-0.699854	0	1
192	SA_011	W	3	0.5	0.00023889	0.00015159	7.73431	-0.349927	0	0.666667
193	SA_411	M	2	237.5	0.00030893	5.71e-05	6.74268	-0.699854	0	1
194	SA_450	M	2	37.7924	0.00038285	0.00170526	5.45397	-0.699854	0	1
195	SA_750	M	12	2005.69	0.00041203	0.013505	4.96653	2.44949	0.152778	0.30303
196	SA_668	M	7	3301.17	0.00035727	0.00131065	5.78033	1.64809	1.11e-16	0.190476
197	SA_517	M	2	473	0.00030665	8.54e-05	6.7636	-0.635407	0	1
198	SA_140	M	2	0	0.00023861	1e-05	8.74059	-0.635407	0	1
199	SA_443	W	2	0	0.00023861	1e-05	8.74059	-0.635407	0	1
200	SA_486	W	2	473	0.00030665	8.54e-05	6.7636	-0.635407	0	1
201	SA_725	M	3	0	0.00037951	0.00138244	5.45397	-0.516577	0	1
202	SA_235	M	2	0	0.00035958	0.00073308	5.74268	-0.902865	0	1
203	SA_838	W	2	0	0.00028678	0.0004339	7.2636	-1.04049	0	1
204	SA_619	W	7	5151.56	0.00034746	0.00315178	5.98745	1.65985	1.11e-16	0.238095
205	SA_406	W	2	0	0.00029789	0.00019387	6.96862	-1.10657	0	1
206	SA_700	M	3	0.5	0.00031776	0.00118391	6.5523	-0.516984	0	0.666667
207	SA_342	M	2	158.333	0.00037397	0.00062437	5.56067	-0.787786	0	1
208	SA_343	M	2	158.333	0.00037397	0.00062437	5.56067	-0.787786	0	1
209	SA_717	M	2	0	0.00042955	0.00837056	4.83264	-1.40795	0	1
210	SA_614	M	2	0	0.00042955	0.00837056	4.83264	-1.40795	0	1
211	SA_130	W	2	18.7292	0.00042863	0.0108807	4.83054	-1.40795	0	1
212	SA_849	M	5	559.133	0.00037244	0.00186806	5.58368	0.0246183	0	0.5
213	SA_197	W	2	0	0.00026738	0.00029079	7.78033	-0.635407	0	1
214	SA_484	W	2	0	0.00026738	0.00029079	7.78033	-0.635407	0	1
215	SA_632	W	4	2826	0.0002986	0.0001952	6.95607	0	0	0.333333
216	SA_608	M	2	0	0.00026178	1.2e-05	7.94142	-1.10657	0	1
217	SA_858	M	2	0	0.00034282	0.0001556	6.04393	-0.902865	0	1
218	SA_686	M	2	0	0.00034282	0.0001556	6.04393	-0.902865	0	1
219	SA_666	M	2	0	0.00037313	0.00045252	5.57322	-0.708919	0	1
220	SA_572	W	2	0	0.00037313	0.00045252	5.57322	-0.708919	0	1
221	SA_455	W	2	0	0.00037313	0.00045252	5.57322	-0.708919	0	1
222	SA_571	W	2	0	0.00037313	0.00045252	5.57322	-0.708919	0	1
223	SA_818	W	2	0	0.00037908	0.00117788	5.46234	-0.787786	0	1
224	SA_162	M	2	0	0.00029507	3.39e-06	7.06695	-0.558156	0	1
225	SA_282	M	2	0	0.00029507	3.39e-06	7.06695	-0.558156	0	1
226	SA_790	W	2	18.6258	0.00044603	0.0749825	4.659	-0.808703	0	1
227	SA_580	W	10	610.767	0.00046707	0.339958	4.42678	0.337614	0	0.644444
228	SA_548	W	2	0	0.00029762	0.00013383	6.97699	-1.10657	0	1
229	SA_826	M	4	805.682	0.00029967	0.00032463	6.96025	0	0	0.333333
230	SA_030	W	2	235	0.00042373	0.0491479	4.87448	-0.808703	0	1
231	SA_151	W	2	34.0957	0.00037341	0.00054202	5.56485	-0.708919	0	1
232	SA_667	M	2	0	0.00039872	0.00536461	5.22176	-1.64317	0.5	1
233	SA_623	W	3	230.031	0.00036049	0.00061863	5.72803	-0.516577	0	0.333333
234	SA_183	W	2	0	0.00036049	0.00036315	5.76778	-0.708919	0	1
235	SA_179	M	2	0	0.00039604	0.0004194	5.21548	-0.708919	0	1
236	SA_294	M	6	4029.65	0.00042283	0.00069477	4.90167	-0.324234	0.444444	0.2
237	SA_527	M	2	0	0.00040323	0.00172048	5.1569	-0.902865	0	1
238	SA_260	M	2	0	0.00035273	4.27e-05	5.8954	-0.708919	0	1
239	SA_044	M	2	0	0.00035273	4.27e-05	5.8954	-0.708919	0	1
240	SA_318	W	2	0	0.0003873	0.00030873	5.33891	-1.05859	0.5	1
241	SA_754	W	2	158.518	0.00040502	0.00160669	5.12552	-0.787786	0	1
242	SA_766	M	6	1892	0.00026212	0.00021183	7.93305	1.10657	0	0.466667
243	SA_261	M	5	1519.09	0.00044464	0.00630353	4.6841	0.0246183	0	0.7
244	SA_633	W	2	0	0.00033167	7.53e-05	6.24895	-0.787786	0	1
245	SA_268	W	2	0	0.00033167	7.53e-05	6.24895	-0.787786	0	1
246	SA_731	M	5	950	0.00040453	0.00065939	5.12971	1.78885	0.32	0.4
247	SA_147	M	2	0	0.00034025	4.05e-05	6.12343	-0.447214	0	1
248	SA_829	M	2	0	0.00034106	0.0104734	6.10042	-0.951992	0.5	1
249	SA_634	W	8	4264.16	0.00040717	0.170141	5.12134	-0.0922549	0.21875	0.428571
250	SA_059	W	2	0	0.00030656	8.06e-05	6.77406	-0.635407	0	1
251	SA_748	W	7	3141	0.00040833	0.0257946	5.08996	-0.553283	0.489796	0.571429
252	SA_665	M	23	18664.9	0.00054555	0.0741983	3.79916	2.73263	0.499055	0.185771
253	SA_643	M	2	0	0.00049237	0.062222	4.20711	-0.951992	0.5	1
254	SA_468	M	2	0	0.00045935	0.0617778	4.51464	-0.808703	0	1
255	SA_081	W	2	0	0.00043403	0.00456213	4.79289	-0.787786	0	1
256	SA_760	W	2	0	0.00029638	6.04e-05	7.02092	-1.14564	0	1
257	SA_787	M	2	0	0.00029638	6.04e-05	7.02092	-1.14564	0	1
258	SA_824	M	2	0	0.00035423	0.00071033	5.85565	-0.47702	0	1
259	SA_823	M	2	0	0.00035423	0.00071033	5.85565	-0.47702	0	1
260	SA_164	M	4	1107.67	0.00035348	0.00075716	5.84519	0.286212	0	0.333333
261	SA_134	W	2	0	0.00034507	0.00090672	6.04184	-1.2042	0.5	1
262	SA_425	M	2	0	0.00034341	0.00090403	6.05858	-0.887308	0	1
263	SA_553	W	2	0	0.00034341	0.00090403	6.05858	-0.887308	0	1
264	SA_495	W	7	914.612	0.00041806	0.00865082	4.95607	-0.787786	0.408163	0.52381
265	SA_470	M	2	0	0.00030193	4.66e-05	6.83891	-0.47702	0	1
266	SA_008	M	2	0	0.00038023	0.00097974	5.46862	-0.699854	0	1
267	SA_188	M	4	12	0.00035765	0.00341874	5.79498	0.277991	0	0.666667
268	SA_559	W	5	950.5	0.00030637	0.00443865	6.78452	0.734689	0	0.4
269	SA_453	W	2	0	0.00034258	5.36e-05	6.08996	-1.02329	0.5	1
270	SA_461	W	10	3773	0.00034258	5.51e-05	6.07322	2.69776	0.18	0.177778
271	SA_594	M	2	0	0.00036765	0.00028499	5.64435	-0.787786	0	1
272	SA_115	M	2	0	0.00036765	0.00028499	5.64435	-0.787786	0	1
273	SA_612	M	33	24398.1	0.00054054	0.136139	3.83891	2.11192	0.589532	0.200758
274	SA_414	M	6	481.809	0.00037286	0.00107472	5.58159	0.671361	0	0.666667
275	SA_388	M	1	0	0.00031328	6.23e-05	6.57741	-1.29642	0	NA
276	SA_505	M	6	1908.32	0.00045249	0.150937	4.59414	-0.378834	0.277778	0.533333
277	SA_139	M	34	27008.9	0.00058275	1	3.54393	3.63327	0.0570934	0.272727
278	SA_018	M	12	8482.35	0.000407	0.00086993	5.11297	-0.901262	0.652778	0.227273
279	SA_315	M	1	0	0.00037189	0.00042631	5.57531	-0.901262	0	NA
280	SA_423	M	1	0	0.00040177	0.00057882	5.14226	0	0	NA
281	SA_348	M	17	7968.56	0.00049727	0.00999277	4.14644	-0.324234	0.754325	0.213235
282	SA_168	M	1	0	0.00029647	0.00027028	7.01464	-0.901262	0	NA
283	SA_726	M	1	0	0.00026205	0.00018958	7.96234	-1.65985	0	NA
284	SA_372	M	3	0	0.00030349	0.00053974	6.84728	-0.766679	0	1
285	SA_169	M	1	0	0.00041946	0.00971439	4.9205	-0.951992	0	NA
286	SA_827	M	3	950	0.00029507	0.00062256	7.07322	-0.467707	0	0.333333
287	SA_202	W	7	3302	0.00034282	0.0106714	6.08577	1.40312	0.408163	0.333333
288	SA_479	W	1	0	0.00029647	0.00027028	7.01464	-0.901262	0	NA
289	SA_105	W	1	0	0.00035537	0.00066918	5.85774	-0.858637	0	NA
290	SA_480	W	1	0	0.00025806	0.00054055	8.01046	-0.901262	0	NA
291	SA_435	W	1	0	0.00031646	0.0128372	6.15063	-0.951992	0	NA
292	SA_236	W	1	0	0.00031328	6.34e-05	6.6318	-1.05859	0	NA
293	SA_531	M	15	11759.7	0.00052743	0.174922	3.89958	0.0510346	0.551111	0.342857
294	SA_704	M	8	2131	0.00036153	0.0008343	5.75105	1.39971	0	0.214286
295	SA_311	W	1	0	0.00030855	4.83e-05	6.74686	-1.04978	0	NA
296	SA_283	W	19	7041.98	0.0004852	0.0155539	4.25732	3.54503	0.099723	0.251462
297	SA_496	W	1	0	0.00039463	0.00090095	5.25314	-1.05859	0	NA
298	SA_136	W	3	0	0.00026089	0.00039036	7.97071	-0.553283	0	1
299	SA_854	W	1	0	0.00035575	0.00107453	5.8159	-1.09211	0	NA
300	SA_620	W	5	476	0.00035436	0.00081268	5.84728	0.667829	0	0.6
301	SA_683	W	1	0	0.00030221	4.71e-05	6.8431	-0.858637	0	NA
302	SA_564	W	1	0	0.00038168	0.0196918	5.42259	-0.951992	0	NA
303	SA_868	M	6	40.5814	0.00046147	0.00729525	4.49163	0.0246183	0.277778	1
304	SA_795	W	6	40.5814	0.00046147	0.00729525	4.49163	0.0246183	0.277778	1
305	SA_555	W	15	29.9271	0.00051706	0.627521	4.0272	1.05406	0	1
306	SA_837	W	12	55.9131	0.00042808	0.00543493	4.82218	1.02216	0.152778	1
307	SA_675	M	11	18.7292	0.00043103	0.0227306	4.81172	0.455512	0	1
308	SA_083	M	20	1225.43	0.000501	0.862791	4.11506	1.77051	0	0.684211
309	SA_491	M	6	40.5814	0.00039857	0.00252399	5.20084	0.29542	0	1
310	SA_146	M	6	58375	0.00035663	0.00049497	5.77615	0.0604505	0	1
311	SA_240	W	6	0.0625	0.00044248	0.0248675	4.70502	0.0633791	0.277778	1
312	SA_020	M	5	0	0.00043516	0.0118425	4.75314	-0.115752	0.32	1
313	SA_530	M	5	76.7013	0.00044863	0.014247	4.63598	-0.786793	0	1
314	SA_013	M	7	122.396	0.0003659	0.00125504	5.68619	1.06492	1.11e-16	0.619048
315	SA_024	M	5	235	0.00042662	0.0594847	4.8682	-0.378834	0	1
316	SA_741	M	5	102.122	0.00035817	0.00090659	5.80544	-0.131892	0	1
317	SA_078	M	5	0	0.0003785	0.0004935	5.48117	-0.131892	0	1
318	SA_070	M	8	3791.04	0.00043459	0.0113353	4.77824	1.04978	0.21875	0.464286
319	SA_187	W	5	35.3409	0.0004531	0.072616	4.59833	-0.665413	0.48	1
320	SA_159	M	4	0	0.00034364	0.00116679	6.07113	0	375	1
321	SA_509	W	4	27.6711	0.00043573	0.00602203	4.7636	-0.246183	0	1
322	SA_339	M	4	0.388889	0.00046838	0.111657	4.33473	-0.665413	375	1
323	SA_141	M	4	0	0.00043215	0.0669195	4.80753	-0.522124	0	1
324	SA_577	M	4	0	0.00034554	0.00189374	6.03347	0	0	1
325	SA_036	W	4	0	0.00023315	8.55e-07	8.92259	0	0	1
326	SA_005	W	4	58.75	0.000297	7.15e-05	7.01255	-0.843274	0	1
327	SA_805	W	4	0	0.00035524	0.00026699	5.79289	0	625	1
328	SA_265	W	4	0	0.00029464	0.00074813	7.07531	0.467707	0	1
329	SA_284	W	4	0	0.00043821	0.0454541	4.74895	-0.522124	0	1
330	SA_403	M	4	0	0.00035524	0.00081011	5.84937	0.286212	0	1
331	SA_627	W	4	0.25	0.00026674	0.00017947	7.78661	-0.492865	0	1
332	SA_271	W	4	637.001	0.00039277	0.00024956	5.28243	-0.509309	375	1
333	SA_429	M	5	3044.03	0.00042159	0.0156288	4.92469	-0.492865	0.32	0.7
334	SA_441	M	8	8	0.00030703	0.00085167	6.74895	0.445135	0	0.642857
335	SA_789	W	3	0	0.00042463	0.011022	4.88912	-0.47702	0.444444	1
336	SA_622	M	3	0	0.00030647	0.00254867	6.77615	-0.708919	0.444444	1
337	SA_398	M	3	0	0.00035714	0.00038903	5.79707	-0.516577	0	1
338	SA_808	W	3	2.1548	0.00040193	0.00144848	5.1569	-0.787786	0.444444	1
339	SA_540	M	3	257.712	0.00038197	0.0018651	5.43724	-0.349927	0	1
340	SA_296	M	5	745.788	0.00041999	0.00271853	4.91632	-0.115752	0.32	0.4
341	SA_714	M	11	1820.17	0.00038285	0.0120781	5.43515	1.37862	0.165289	0.236364
342	SA_066	M	3	76.7013	0.00042992	0.0123409	4.82636	-1.20089	0	1
343	SA_122	M	3	711.4	0.00035894	0.00239035	5.79707	-0.178708	0	1
344	SA_322	M	21	6291.99	0.00045935	0.00654575	4.49372	2.75324	0.0907029	0.380952
345	SA_522	W	3	273	0.00042212	0.0129136	4.88075	-0.635407	0.444444	1
346	SA_607	M	3	0	0.00029542	0.00144749	6.8682	-0.516984	0	1
347	SA_022	W	3	0	0.00033256	1.65e-05	6.26151	-0.509309	0	1
348	SA_739	M	3	0	0.00029326	3.61e-06	7.06485	-0.093026	0	1
349	SA_536	M	3	0	0.00040469	0.001129	5.12762	0	0.444444	1
350	SA_428	M	5	1727.68	0.00034602	0.00198584	5.99791	0.553283	0	0.4
351	SA_319	W	3	0	0.00036324	0.000373	5.73013	-0.516984	0	1
352	SA_696	M	3	0	0.00034447	0.00096442	6.04184	-0.887308	0.444444	1
353	SA_365	M	3	0	0.00039604	0.0187097	5.23013	-0.665413	0	1
354	SA_641	M	3	433.482	0.00044385	0.0624983	4.69665	-0.665413	0	1
355	SA_143	M	3	35.2784	0.00042427	0.0591771	4.88075	-0.665413	0	1
356	SA_035	W	3	1.06667	0.00035676	0.00233128	5.80753	-0.178708	0	1
357	SA_542	M	3	0	0.00030731	3.28e-05	6.76151	-0.516577	0	1
358	SA_138	W	3	0.2	0.00026076	8.57e-06	8.00209	-0.381881	0	1
359	SA_615	M	16	3483.19	0.00045413	0.00959515	4.56904	2.73263	0.117188	0.283333
360	SA_651	W	4	17.3333	0.00034819	0.00509326	5.9728	-0.246183	0	0.666667
361	SA_724	M	3	0	0.00033546	0.00035528	6.20711	0.182574	0	1
362	SA_597	M	3	0	0.00034141	5.7e-05	6.1046	0	0.444444	1
363	SA_861	M	2	157.667	0.00035373	0.00075177	5.85356	-0.47702	0	1
364	SA_860	M	2	0	0.00030349	0.0063733	6.83891	-0.808703	0	1
365	SA_819	W	2	0	0.00030562	0.00074042	6.7887	-0.708919	0	1
366	SA_796	W	2	1238.91	0.00034554	0.00175424	6.00837	-1.10657	0	1
367	SA_753	W	2	0	0.00037327	0.00045252	5.57322	-0.708919	0	1
368	SA_749	M	2	0	0.00033944	0.00086454	6.09414	-0.787786	0	1
369	SA_705	M	2	0	0.0002867	0.00047519	6.84728	-1.04049	0	1
370	SA_648	M	5	950.5	0.00026911	0.00016288	7.74686	0.734689	0	0.3
371	SA_644	M	2	0	0.00035958	0.00073308	5.74268	-0.902865	0	1
372	SA_637	M	2	0	0.00028678	0.0004339	7.2636	-1.04049	0	1
373	SA_573	W	2	0	0.00036657	0.00037669	5.62552	-0.787786	0	1
374	SA_546	W	6	1892	0.00026205	1.22e-05	7.93305	1.10657	0	0.466667
375	SA_359	M	7	14.6285	0.00035511	0.00199768	5.83891	0.252793	1.11e-16	0.619048
376	SA_336	M	2	12.39	0.00041068	0.00128741	5.06067	-0.708919	0	1
377	SA_256	M	8	2152.37	0.00039635	0.00122472	5.25523	-0.246183	0.59375	0.285714
378	SA_255	M	2	0	0.00034025	4.05e-05	6.12343	-0.447214	0	1
379	SA_237	M	6	596.429	0.00040933	0.116514	5.07113	-0.665413	0.611111	0.4
380	SA_184	W	2	0	0.00030656	8.06e-05	6.77406	-0.635407	0	1
381	SA_126	W	2	0	0.00043403	0.00456213	4.79289	-0.787786	0	1
382	SA_077	W	2	0	0.00030193	4.66e-05	6.83891	-0.47702	0	1
383	SA_063	W	2	0	0.00038023	0.00097974	5.46862	-0.699854	0	1
384	SA_052	M	15	29.9271	0.00051706	0.627521	4.0272	1.05406	0	1
385	SA_420	M	12	55.9131	0.00042608	0.00543493	4.82218	1.02216	0.152778	1
386	SA_198	W	7	0	0.00037608	0.00176622	5.4749	0.566221	1.11e-16	1
387	SA_002	M	7	567.604	0.00041876	0.0164832	4.93933	0.328577	1.11e-16	1
388	SA_341	M	6	27.7823	0.00045351	0.00724237	4.55649	-0.324234	0.444444	1
389	SA_099	W	6	40.5814	0.00039825	0.00252399	5.20084	0.29542	0	1
390	SA_617	W	6	0.0625	0.00044248	0.0248675	4.70502	0.0633791	0.277778	1
391	SA_488	M	5	563.201	0.00041754	0.0138929	4.96234	-0.219051	0	1
392	SA_094	M	5	0	0.00043516	0.0118425	4.75314	-0.115752	0.32	1
393	SA_085	M	5	58.75	0.00029744	7.65e-05	7.01046	-0.210819	0	1
394	SA_113	M	17	9209.91	0.0004985	0.109285	4.16946	2.28165	0.442907	0.301471
395	SA_806	W	5	5.8086	0.00036887	0.00107132	5.58368	0.277805	0	1
396	SA_300	W	5	235	0.00042662	0.0594847	4.8682	-0.378834	0	1
397	SA_191	M	5	0	0.00037764	0.0004935	5.48117	-0.131892	0	1
398	SA_408	M	5	1.56364	0.00040634	0.0223984	5.10042	-0.665413	0.48	1
399	SA_476	W	4	0	0.00034364	0.00116679	6.07113	0	375	1
400	SA_086	M	4	526.479	0.00040933	0.00592312	5.03556	-0.516984	375	1
401	SA_293	M	4	0	0.00023392	1.49e-05	8.92259	0	0	1
402	SA_800	M	4	37.7924	0.00038183	0.00192869	5.44979	0	0	1
403	SA_307	M	9	1299.25	0.00052056	0.165461	3.99582	0.0510346	0.197531	0.75
404	SA_554	W	4	0	0.00043215	0.0669195	4.80753	-0.522124	0	1
405	SA_337	M	4	0	0.00034554	0.00189374	6.03347	0	0	1
406	SA_628	M	9	616.047	0.00048031	0.00925869	4.32427	0.252793	0.345679	0.611111
407	SA_076	M	4	58.75	0.000297	7.15e-05	7.01255	-0.843274	0	1
408	SA_640	M	4	0	0.00029464	0.00074813	7.07531	0.467707	0	1
409	SA_034	W	4	0	0.00043821	0.0454541	4.74895	-0.522124	0	1
410	SA_206	W	4	0.25	0.00026674	0.00017947	7.78661	-0.492865	0	1
411	SA_783	M	3	58375	0.00035817	0.00040334	5.7887	-0.516577	0	1
412	SA_782	M	3	0	0.00042463	0.011022	4.88912	-0.47702	0.444444	1
413	SA_721	M	3	787.079	0.00035881	0.00138194	5.78033	-0.708919	0.444444	1
414	SA_718	M	3	0	0.00035714	0.00038903	5.79707	-0.516577	0	1
415	SA_471	M	3	0	0.00033256	1.65e-05	6.26151	-0.509309	0	1
416	SA_331	M	3	2	0.00034495	0.00196074	6.01674	-0.553283	0	1
417	SA_326	M	3	0	0.00036324	0.000373	5.73013	-0.516984	0	1
418	SA_324	W	3	0	0.00029326	3.61e-06	7.06485	-0.093026	0	1
419	SA_306	M	3	0	0.00034626	0.00088476	5.95816	-0.349927	0	1
420	SA_246	M	3	0	0.00034447	0.00096442	6.04184	-0.887308	0.444444	1
421	SA_238	M	11	1470.16	0.00048757	0.285584	4.23849	0.480903	0	0.563636
422	SA_176	M	3	0	0.00030731	3.28e-05	6.76151	-0.516577	0	1
423	SA_106	M	3	0.333333	0.00028711	0.00051019	6.84519	-0.766679	0	1
424	SA_103	W	3	0.2	0.00026076	8.57e-06	8.00209	-0.381881	0	1
425	SA_073	M	3	0	0.00037495	0.00062861	5.56067	-0.516984	0	1
426	SA_053	M	7	1894.56	0.00030525	0.00253914	6.79707	0.328577	1.11e-16	0.428571
427	SA_040	W	3	46.1203	0.00037636	0.0013949	5.50209	-0.516984	0	1
428	SA_033	W	3	0	0.00033546	0.00035528	6.20711	0.182574	0	1
429	SA_525	M	11	18.7292	0.00043103	0.0227306	4.81172	0.455512	0	1
430	SA_210	M	8	48.164	0.00048948	0.282511	4.24477	0.0510346	0	1
431	SA_613	W	7	0	0.00037608	0.00176622	5.4749	0.566221	1.11e-16	1
432	SA_671	M	7	567.604	0.00041876	0.0164832	4.93933	0.328577	1.11e-16	1
433	SA_355	M	6	27.7823	0.00045558	0.00724237	4.55649	-0.324234	0.444444	1
434	SA_104	W	6	0.0625	0.0004415	0.0248675	4.70502	0.0633791	0.277778	1
435	SA_596	M	5	563.201	0.00041754	0.0138929	4.96234	-0.219051	0	1
436	SA_475	M	10	2413.84	0.0004415	0.0122434	4.70711	1.85203	0.18	0.466667
437	SA_131	W	5	76.7013	0.00044863	0.014247	4.63598	-0.786793	0	1
438	SA_220	M	5	58.75	0.00029744	7.65e-05	7.01046	-0.210819	0	1
439	SA_410	M	5	7.13929	0.00033156	0.00489712	6.27615	-0.219051	0	1
440	SA_221	M	5	235	0.00042662	0.0594847	4.8682	-0.378834	0	1
441	SA_747	M	5	102.122	0.00035286	0.00090659	5.80544	-0.131892	0	1
442	SA_809	W	5	0	0.00037764	0.0004935	5.48117	-0.131892	0	1
443	SA_459	W	5	37.7924	0.00043384	0.0112046	4.79498	0	0.32	1
444	SA_775	M	13	15111.7	0.00049727	0.289081	4.17364	0.480903	0.260355	0.487179
445	SA_735	M	4	0	0.00034364	0.00116679	6.07113	0	375	1
446	SA_703	M	4	0	0.00023392	1.49e-05	8.92259	0	0	1
447	SA_413	M	4	0	0.00034554	0.00189374	6.03347	0	0	1
448	SA_299	W	4	0	0.00023315	8.55e-07	8.92259	0	0	1
449	SA_199	M	19	3954.72	0.00052301	0.638041	3.9749	1.62722	0	0.649123
450	SA_121	M	15	29.9271	0.00051203	0.627521	4.0272	1.05406	0	1
451	SA_845	M	11	18.7292	0.00043103	0.0227306	4.81172	0.455512	0	1
452	SA_492	M	7	0	0.00037608	0.00176622	5.4749	0.566221	1.11e-16	1
453	SA_865	M	7	59.25	0.00049068	0.0866009	4.24477	-0.235544	0.244898	1
454	SA_636	M	6	58375	0.00035663	0.00049497	5.77615	0.0604505	0	1
455	SA_592	W	5	58.75	0.00029744	7.65e-05	7.01046	-0.210819	0	1
456	SA_551	W	5	0.0625	0.00040177	0.0154097	5.12134	0.0633791	0	1
457	SA_503	M	5	0	0.00040683	0.00251357	5.05439	-0.115752	0.32	1
458	SA_222	M	5	37.7924	0.00043384	0.0112046	4.79498	0	0.32	1
459	SA_366	M	15	29.9271	0.00051203	0.627521	4.0272	1.05406	0	1
460	SA_093	W	12	55.9131	0.00042608	0.00543493	4.82218	1.02216	0.152778	1
461	SA_016	M	11	18.7292	0.00043103	0.0227306	4.81172	0.455512	0	1
462	SA_839	W	7	0	0.00037608	0.00176622	5.4749	0.566221	1.11e-16	1
463	SA_201	M	7	567.604	0.00041876	0.0164832	4.93933	0.328577	1.11e-16	1
464	SA_856	M	22	9997.74	0.00055525	0.677051	3.72803	1.9138	0.0867769	0.558442
465	SA_524	M	10	647.691	0.00045228	0.00930952	4.59414	1.10782	0.18	0.644444
466	SA_281	M	6	58375	0.00035663	0.00049497	5.77615	0.0604505	0	1
467	SA_194	M	15	29.9271	0.00051151	0.627521	4.0272	1.05406	0	1
468	SA_205	W	11	18.7292	0.00043103	0.0227306	4.81172	0.455512	0	1
469	SA_415	M	7	567.604	0.00041876	0.0164832	4.93933	0.328577	1.11e-16	1
470	SA_015	M	7	59.25	0.00048924	0.0866009	4.24477	-0.235544	0.244898	1
471	SA_521	W	12	55.9131	0.00042608	0.00543493	4.82218	1.02216	0.152778	1
472	SA_494	W	11	18.7292	0.00043103	0.0227306	4.81172	0.455512	0	1
473	SA_833	M	11	18.7292	0.00043103	0.0227306	4.81172	0.455512	0	1
474	SA_328	M	15	29.9271	0.00051151	0.627521	4.0272	1.05406	0	1
475	SA_543	M	12	55.9131	0.00042608	0.00543493	4.82218	1.02216	0.152778	1
476	SA_361	W	11	18.7292	0.00043103	0.0227306	4.81172	0.455512	0	1
477	SA_089	M	15	29.9271	0.00051151	0.627521	4.0272	1.05406	0	1
478	SA_190	M	15	29.9271	0.00051151	0.627521	4.0272	1.05406	0	1
